# Supplementary material for: Nitro ⇌ aci-nitro tautomerism and E/Z isomeric preferences of nitroethenediamine derivatives: a quantum chemical study
Source: Royal Society of Chemistry journal article supplement (doi:10.1039/c3ra43621g), 2013-01-01
Supplement: c3ra43621g.pdf [file c3ra43621g.pdf]

## Supporting Information

### **Nitro $\rightleftharpoons$ *aci*-nitro tautomerism and *E/Z* isomeric preferences of Nitroethenediamine Derivatives: A quantum chemical study**

**Devendra K. Dhaked and Prasad V. Bharatam\***

*Department of Medicinal Chemistry, National Institute of Pharmaceutical Education and  
Research (NIPER), Sector-67, S. A. S. Nagar - 160 062, Punjab, India.*

[pvbharatam@niper.ac.in](mailto:pvbharatam@niper.ac.in)

### **Table of Contents**

|                                                                                                                                                                                        |   |
|----------------------------------------------------------------------------------------------------------------------------------------------------------------------------------------|---|
| <b>Table S1.</b> Relative energy of <b>N-1</b> and <b>N-10</b> at different levels of theory. ....                                                                                     | 2 |
| <b>Table S2.</b> Relative energy of various microsolvated water clusters of <b>N-1</b> , <b>N-10</b> and <b>N-13</b> in the presence of 1-4 water molecules. <sup>a</sup> .....        | 2 |
| <b>Figure S 1.</b> Optimized geometries (M06-2X/6-31+(d,p)) of microsolvated water clusters of <b>N-1</b> , <b>N-10</b> and <b>N-13</b> in the presence of one water molecules. ....   | 4 |
| <b>Figure S 2.</b> Optimized geometries (M06-2X/6-31+(d,p)) of microsolvated water clusters of <b>N-1</b> , <b>N-10</b> and <b>N-13</b> in the presence of two water molecules. ....   | 5 |
| <b>Figure S 3.</b> Optimized geometries (M06-2X/6-31+(d,p)) of microsolvated water clusters of <b>N-1</b> , <b>N-10</b> and <b>N-13</b> in the presence of three water molecules. .... | 6 |
| <b>Figure S 4.</b> Optimized geometries (M06-2X/6-31+(d,p)) of microsolvated water clusters of <b>N-1</b> , <b>N-10</b> and <b>N-13</b> in the presence of four water molecules. ....  | 7 |
| <b>Figure S5.</b> Protonated nitronic acid dependant conversion of nitronic acid to enamine. ....                                                                                      | 8 |
| <b>Figure S6.</b> Optimized transition states of amine and nitro substituted molecules ( <b>1b-1g</b> ) for C1-C2 double bond rotational barrier at B3LYP/6-31+g(d,p) level. ....      | 8 |
| <b>Table S3.</b> Absolute energies of given molecules at B3LYP, MP2(Full), M06-2X and BHandHLYP levels of theory. <sup>a</sup> .....                                                   | 9 |

**Table S4.** Absolute energies and proton affinities of protonated isomers (**HN-1**, **HN-2** and **HN-3**) of **N-1**.<sup>a</sup> ..... 10

**Table S5.** Absolute energies of amine and nitro substituted molecules at B3LYP and MP2(Full) levels of theory.<sup>a</sup> ..... 10

**S1.** Cartesian coordinates of various geometrical isomers and tautomers of model nitroethylenediamine moiety (**N-1** to **N-14** and **N-16**) at B3LYP/6-311+G(d,p) level. .... 11

**S2.** Cartesian coordinates of various microsolvated water clusters of **N-1**, **N-10** and **N-13** in the presence of 1-4 water molecules at M06-2X/6-31+G(d,p) level ..... 15

**S3.** Cartesian coordinates of various amino and nitro substituted ethylenes (**1b-1g**)..... 31

**Table S1.** Relative energy of **N-1** and **N-10** at different levels of theory.

| Level of theory     | Absolute Energy (a.u.) |               | Relative energy <sup>a</sup> (kcal/mol)     |
|---------------------|------------------------|---------------|---------------------------------------------|
|                     | <b>N-10</b>            | <b>N-1</b>    | $\Delta E=(\mathbf{N-10}) - (\mathbf{N-1})$ |
| G2MP2               | -510.80586197          | -510.80921788 | 2.10                                        |
| CBS-QB3             | -510.78011924          | -510.78477869 | 2.93                                        |
| B2-PLYP/6-311+(d,p) | -510.85067358          | -510.86072385 | 6.30                                        |
| MP2-FC/6-31/+G(d,p) | -510.31492             | -510.3131403  | -1.12                                       |
| MP2-FC/6-311+G(d,p) | -510.50467             | -510.5021036  | -1.61                                       |
| B3PW91/6-31/+G(d,p) | -511.59279             | -511.6057988  | 8.16                                        |
| B3LYP/6-311+G(d,p)  | -511.90522             | -511.9165911  | 7.13                                        |

<sup>a</sup> Relative energies are relative to **N-1**, positive sign indicates that **N-1** is preferred while negative sign indicates that **N-10** is preferred.

**Table S2.** Relative energy of various microsolvated water clusters of **N-1**, **N-10** and **N-13** in the presence of 1-4 water molecules.<sup>a</sup>

| Number of water molecules | Entry            | B3LYP/6-31+G(d,p) | M06-2X/6-31+G(d,p) |
|---------------------------|------------------|-------------------|--------------------|
| <b>1w</b>                 | <b>N-1-1w</b>    | 0.00              | 0.00               |
|                           | <b>N-1-1w-a</b>  | -0.36             | 1.05               |
|                           | <b>N-1-1w-b</b>  | 1.61              | 2.13               |
|                           | <b>N-10-1w</b>   | 8.05              | 6.03               |
|                           | <b>N-10-1w-a</b> | 8.42              | 7.29               |
|                           | <b>N-10-1w-b</b> | 10.03             | 10.17              |
|                           | <b>N-13-1w</b>   | 10.89             | 10.40              |
|                           | <b>N-13-1w-a</b> | 14.77             | 13.52              |

|           |                  |                             |       |
|-----------|------------------|-----------------------------|-------|
|           | <b>N-13-1w-b</b> | 16.32                       | 15.84 |
| <b>2w</b> | <b>N-1-2w</b>    | 0.00                        | 0.00  |
|           | <b>N-1-2w-a</b>  | 3.02                        | 3.42  |
|           | <b>N-1-2w-b</b>  | 4.54                        | 5.03  |
|           | <b>N-10-2w</b>   | 10.06                       | 8.82  |
|           | <b>N-10-2w-a</b> | 11.47                       | 9.26  |
|           | <b>N-10-2w-b</b> | 13.34                       | 11.73 |
|           | <b>N-13-2w</b>   | 11.32                       | 10.66 |
|           | <b>N-13-2w-a</b> | 15.54                       | 13.72 |
|           | <b>N-13-2w-b</b> | Converged to <b>N-13-2w</b> | 17.12 |
|           | <b>N-13-2w-c</b> | 19.98                       | 19.28 |
| <b>3w</b> | <b>N-1-3w</b>    | 0.00                        | 0.00  |
|           | <b>N-1-3w-a</b>  | 0.47                        | 1.45  |
|           | <b>N-1-3w-b</b>  | 1.64                        | 5.92  |
|           | <b>N-10-3w</b>   | 11.13                       | 9.49  |
|           | <b>N-10-3w-a</b> | 10.51                       | 9.58  |
|           | <b>N-10-3w-b</b> | 12.28                       | 10.39 |
|           | <b>N-13-3w</b>   | 7.95                        | 8.77  |
|           | <b>N-13-3w-a</b> | 12.03                       | 10.84 |
|           | <b>N-13-3w-b</b> | 14.00                       | 13.17 |
|           | <b>N-13-3w-c</b> | 17.06                       | 16.25 |
| <b>4w</b> | <b>N-1-4w</b>    | 0.00                        | 0.00  |
|           | <b>N-1-4w-a</b>  | -0.28                       | 1.78  |
|           | <b>N-1-4w-b</b>  | 3.78                        | 2.60  |
|           | <b>N-1-4w-c</b>  | Structure distorted         | 4.16  |
|           | <b>N-10-4w</b>   | 10.70                       | 8.96  |
|           | <b>N-10-4w-a</b> | 11.69                       | 10.23 |

|  |                  |       |       |
|--|------------------|-------|-------|
|  | <b>N-10-4w-b</b> | 14.70 | 12.93 |
|  | <b>N-13-4w</b>   | 10.39 | 8.34  |
|  | <b>N-13-4w-a</b> | 11.10 | 8.59  |
|  | <b>N-13-4w-b</b> | 14.49 | 10.99 |
|  | <b>N-13-4w-c</b> | 14.13 | 13.37 |

<sup>a</sup> All energies are corrected for zero-point vibrational energy.

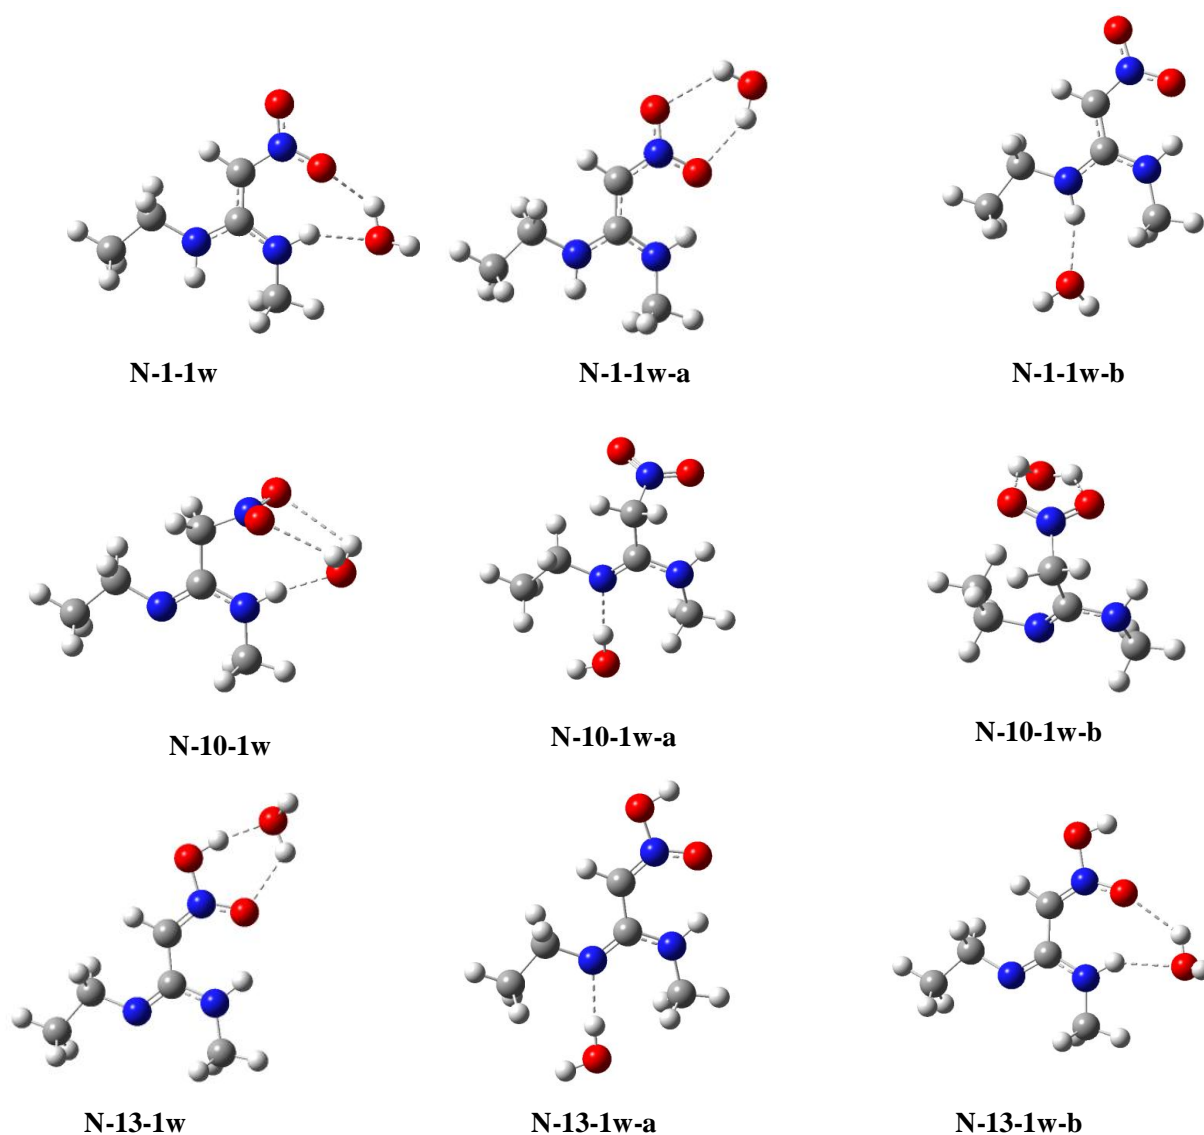

**Figure S 1.** Optimized geometries (M06-2X/6-31+(d,p)) of microsolvated water clusters of **N-1**, **N-10** and **N-13** in the presence of one water molecules.

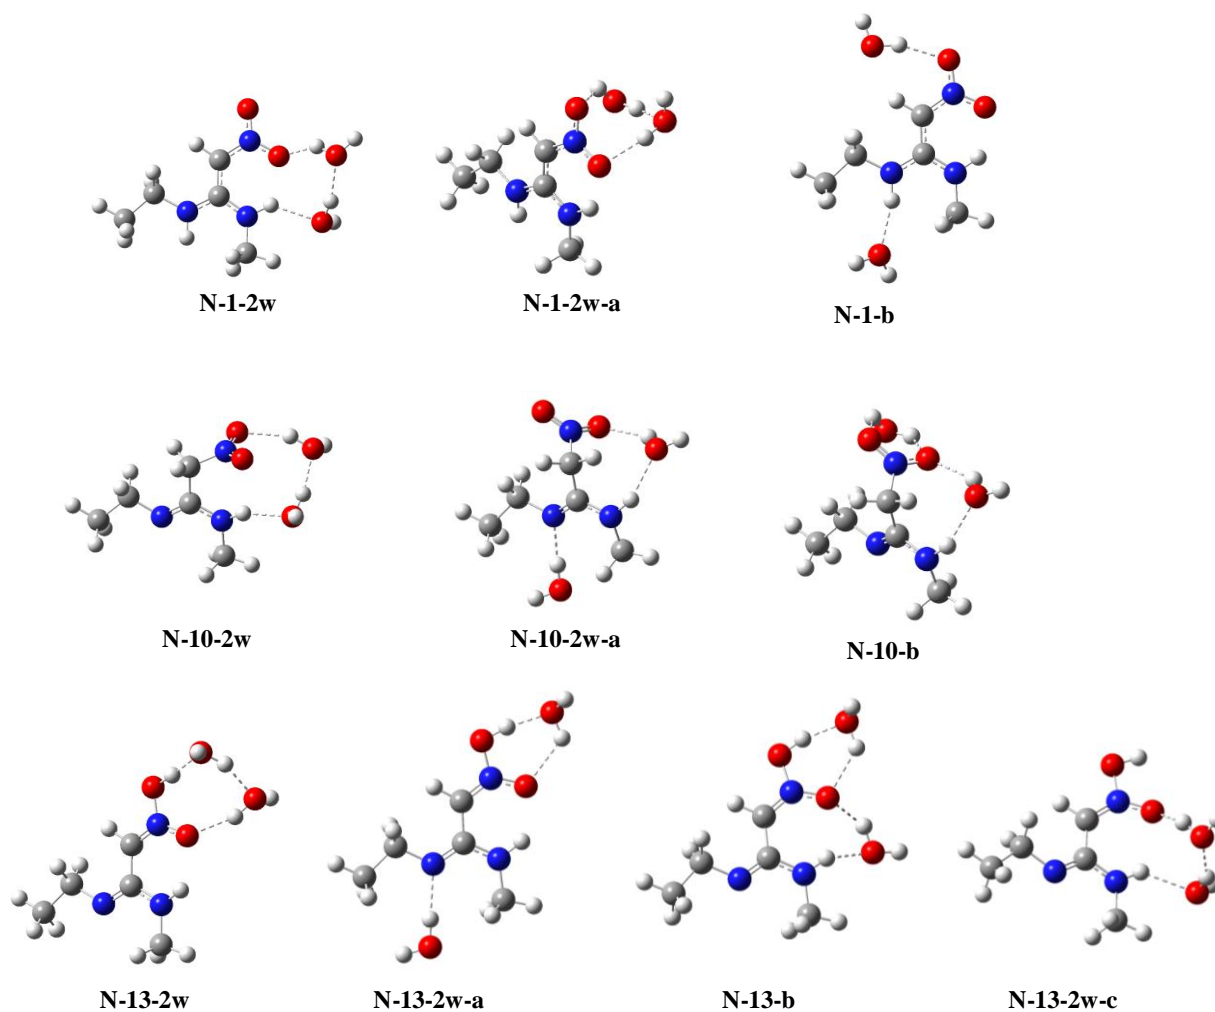

**Figure S 2.** Optimized geometries (M06-2X/6-31+(d,p)) of microsolvated water clusters of **N-1**, **N-10** and **N-13** in the presence of two water molecules.

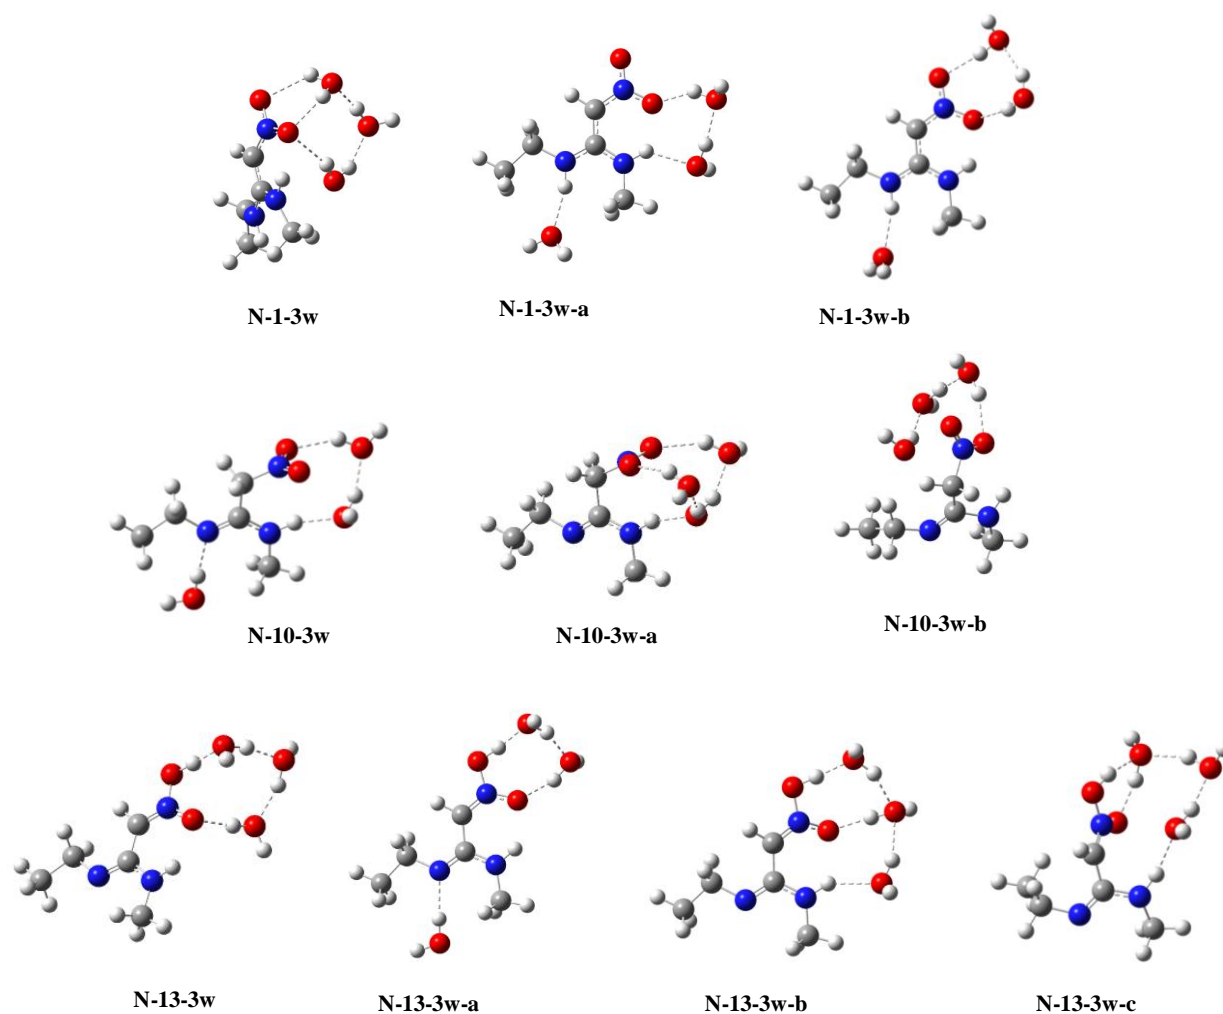

**Figure S 3.** Optimized geometries (M06-2X/6-31+(d,p)) of microsolvated water clusters of **N-1**, **N-10** and **N-13** in the presence of three water molecules.

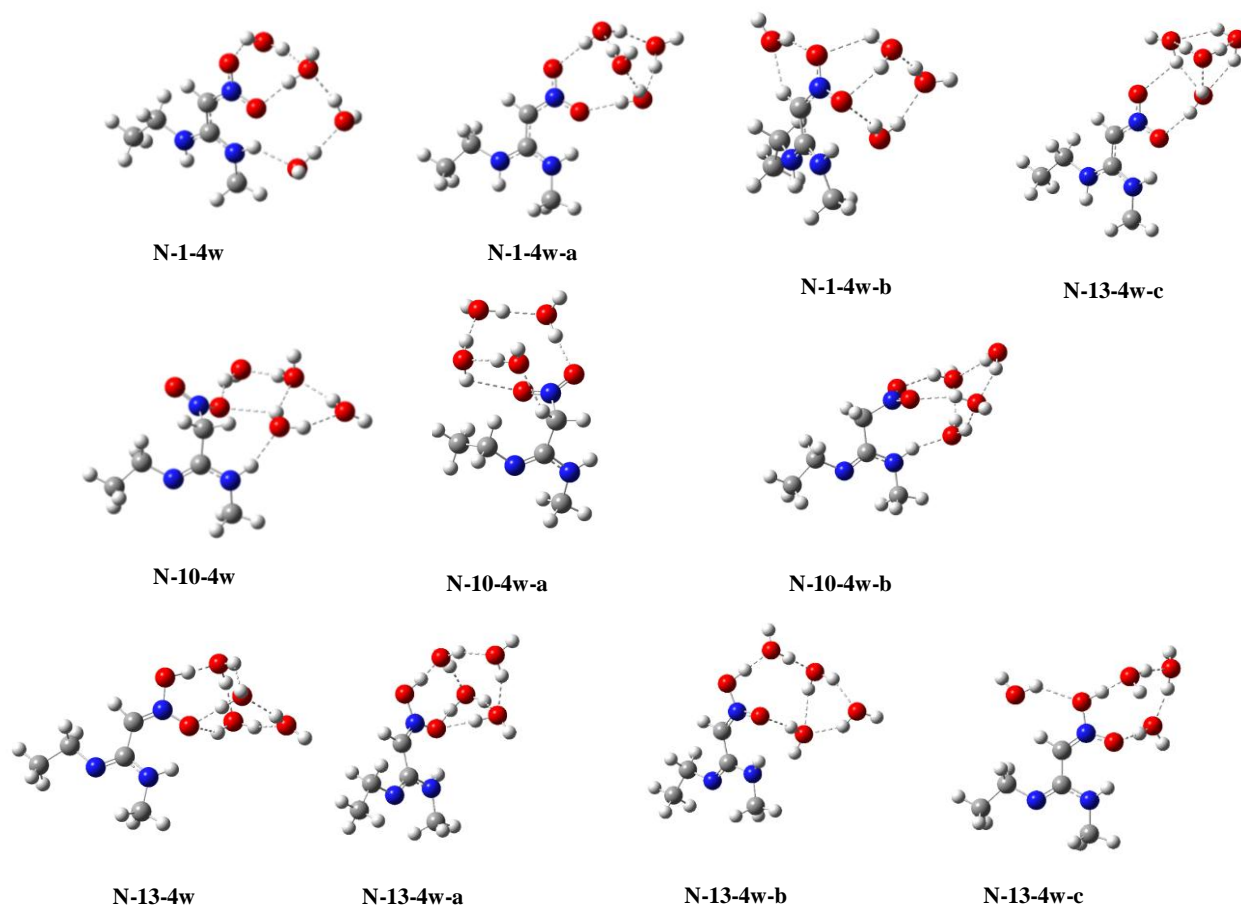

**Figure S 4.** Optimized geometries (M06-2X/6-31+(d,p)) of microsolvated water clusters of **N-1**, **N-10** and **N-13** in the presence of four water molecules.



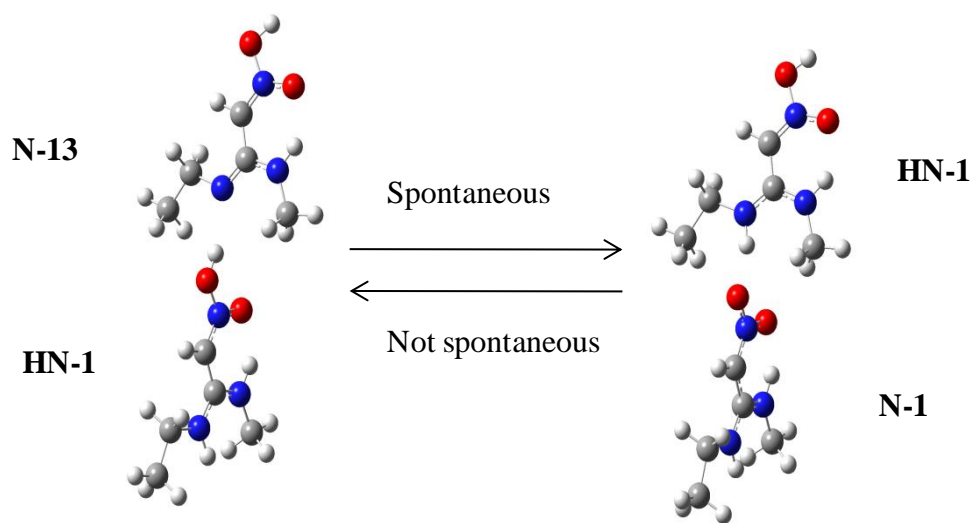

**Figure S5.** Protonated nitronic acid dependant conversion of nitronic acid to enamine.

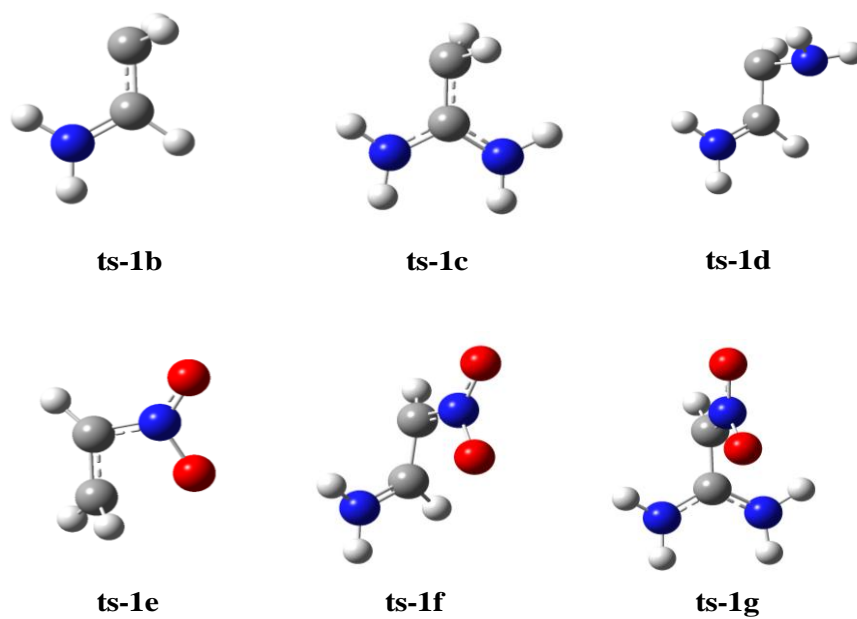

**Figure S6.** Optimized transition states of amine and nitro substituted molecules (**1b-1g**) for C1-C2 double bond rotational barrier at B3LYP/6-31+g(d,p) level.

**Table S3.** Absolute energies of given molecules at B3LYP, MP2(Full), M06-2X and BHandHLYP levels of theory. <sup>a</sup>

| Entry       | B3LYP <sup>b</sup> | MP2 (Full) <sup>b</sup> | M06-2X <sup>b</sup> | B3LYP <sup>c</sup> | BHandHLYP <sup>c</sup> | MP2 (Full) <sup>c</sup> |
|-------------|--------------------|-------------------------|---------------------|--------------------|------------------------|-------------------------|
| <b>N-1</b>  | -511.6290473       | -510.1859021            | -511.38816          | -511.7449515       | -511.413370            | -510.5226036            |
| <b>N-2</b>  | -511.6287526       | -510.1858681            | -511.38796          | -511.7447485       | -511.413337            | -510.5226214            |
| <b>N-3</b>  | -511.6233806       | -510.1825521            | -511.38263          | -511.73927         | -511.406842            | -510.5192946            |
| <b>N-4</b>  | -511.6230872       | -510.182545             | -511.38266          | -511.7389961       | -511.406610            | -510.5194178            |
| <b>N-5</b>  | -511.6149252       | -510.1761088            | -511.37614          | -511.7312606       | -511.399351            | -510.5136629            |
| <b>N-6</b>  | -511.6148868       | -510.1758015            | -511.37591          | -511.7312212       | -511.399306            | -510.5131146            |
| <b>N-7</b>  | -511.6138766       | -510.1739729            | -511.37494          | -511.7301583       | -511.398155            | -510.511241             |
| <b>N-8</b>  | -511.6141377       | -510.1746645            | -511.37528          | -511.7303922       | -511.398409            | -510.5121535            |
| <b>N-9</b>  | -511.6171092       | -510.1861486            | -511.37815          | -511.7334897       | -511.401266            | -510.5249029            |
| <b>N-10</b> | -511.6173462       | -510.1869951            | -511.37843          | -511.7338294       | -511.401733            | -510.5246717            |
| <b>N-11</b> | -511.6152883       | -510.1861506            | -511.37844          | -511.7318501       | -511.400549            | -510.5240766            |
| <b>N-12</b> | -511.6155688       | -510.1862075            | -511.3785           | -511.7320999       | -511.400714            | -510.5240027            |
| <b>N-13</b> | -511.607407        | -510.1680868            | -511.36783          | -511.7235269       | -511.389913            | -510.5054716            |
| <b>N-14</b> | -511.600434        | -510.1614227            | -511.3606           | -511.7165764       | -511.382343            | -510.4986307            |
| <b>N-15</b> | --                 | --                      | -511.38814          | --                 | -511.396750            | -510.5136655            |
| <b>N-16</b> | -511.5678635       | -510.1204614            | -511.32993          | -511.6842085       | -511.350731            | -510.4605897            |

<sup>a</sup> All energies are corrected for zero-point vibrational energy. <sup>b</sup> Basis set 6-31+G(d,p) is used for optimizations. <sup>c</sup> Basis set 6-311+G(d,p) is used for optimizations.

**Table S4.** Absolute energies and proton affinities of protonated isomers (**HN-1**, **HN-2** and **HN-3**) of **N-1**.<sup>a</sup>

| Entry       | Absolute energies  |                    | Absolute proton affinities |                    |
|-------------|--------------------|--------------------|----------------------------|--------------------|
|             | B3LYP <sup>b</sup> | B3LYP <sup>c</sup> | B3LYP <sup>b</sup>         | B3LYP <sup>c</sup> |
| <b>N-1</b>  | --                 | --                 | -511.4423                  | -511.5588          |
| <b>HN-1</b> | -511.991347        | -512.1066706       | -511.7911                  | -511.9072          |
| <b>HN-2</b> | -511.985548        | -512.1013905       | -511.7849                  | -511.9014          |
| <b>HN-3</b> | -511.983102        | -512.0990597       | -511.7830                  | -511.8997          |

<sup>a</sup> All energies are corrected for zero-point vibrational energy. <sup>b</sup> Basis set 6-31+G(d,p) is used for optimizations. <sup>c</sup> Basis set 6-311+G(d,p) is used for optimizations.

**Table S5.** Absolute energies of amine and nitro substituted molecules at B3LYP and MP2(Full) levels of theory.<sup>a</sup>

| Entry          | B3LYP <sup>b</sup> | MP2 Full <sup>b</sup> | B3LYP <sup>c</sup> | MP2 Full <sup>c</sup> |
|----------------|--------------------|-----------------------|--------------------|-----------------------|
| <b>1b</b>      | -133.8975608       | -133.4806774          | -133.9273744       | -133.568993           |
| <b>1c</b>      | -189.2475007       | -188.6833846          | -189.2910774       | -188.8086711          |
| <b>1d</b>      | -189.2333137       | -188.6679405          | -189.2771586       | -188.7931602          |
| <b>1e</b>      | -283.0551652       | -282.3040549          | -283.1250919       | -282.4924377          |
| <b>1f</b>      | -338.413552        | -337.5083660          | -338.4969125       | -337.7319321          |
| <b>1g</b>      | -393.7730238       | -392.7186675          | -393.8696525       | -392.9790211          |
| <b>ts-1b</b>   | -133.810837        | -133.3861273          | -133.840570        | -133.4761303          |
| <b>ts-1c</b>   | -189.1837914       | -188.6131796          | -189.227325        | -188.7389799          |
| <b>ts-1d</b>   | -189.1370128       | -188.5654540          | -189.180066        | -188.6903594          |
| <b>ts-1e</b>   | -282.9784919       | -282.2212373          | -283.046488        | -282.4065702          |
| <b>ts-1f</b>   | -338.35199         | -337.4412458          | -338.434291        | -337.6630109          |
| <b>ts-1g</b>   | -393.7294312       | -392.6736155          | -393.825759        | -392.9318551          |
| <b>ts-N-1</b>  | -511.592275        | -510.1516067          | -511.708012        | -510.4862052          |
| <b>ts-N-3</b>  | -511.5848149       | -510.1423536          | -511.700360        | -510.4772502          |
| <b>ts-N-6</b>  | -511.5893295       | -510.1492786          | -511.705074        | -510.4838322          |
| <b>ts-N-13</b> | -511.5986697       | -510.1624224          | -511.715169        | -510.4995108          |
| <b>ts-N-14</b> | -511.5973325       | --                    | --                 | --                    |

<sup>a</sup> All energies are corrected for zero-point vibrational energy. <sup>b</sup> Basis set 6-31+G(d,p) is used for optimizations. <sup>c</sup> Basis set 6-311+G(d,p) is used for optimizations.



|   |           |           |           |
|---|-----------|-----------|-----------|
| C | -1.258558 | -0.842005 | -0.163931 |
| H | -1.683647 | -1.799338 | -0.416213 |
| N | -2.212160 | 0.160782  | 0.031569  |
| O | -1.849268 | 1.303425  | 0.413530  |
| O | -3.399527 | -0.120261 | -0.165935 |
| C | 2.031121  | 0.957520  | 0.003933  |
| H | 2.388547  | 0.387722  | -0.856976 |
| H | 2.721740  | 0.770282  | 0.834801  |
| C | 2.011732  | 2.450335  | -0.317116 |
| H | 3.022643  | 2.796697  | -0.545183 |
| H | 1.371946  | 2.659248  | -1.177453 |
| H | 1.642999  | 3.031752  | 0.532424  |
| C | 1.994881  | -2.204671 | 0.388975  |
| H | 2.464407  | -3.054723 | -0.106714 |
| H | 2.765362  | -1.455647 | 0.563009  |
| H | 1.600877  | -2.532111 | 1.358465  |

#### N-5

|   |           |           |           |
|---|-----------|-----------|-----------|
| N | 0.957237  | -0.847736 | 0.323098  |
| N | -1.054013 | -1.912906 | 0.078732  |
| C | -0.364521 | -0.721263 | 0.033497  |
| H | 1.205242  | -1.623168 | 0.920358  |
| H | -0.536653 | -2.724769 | -0.224948 |
| C | -1.031524 | 0.435789  | -0.322465 |
| H | -1.961565 | 0.400502  | -0.862916 |
| N | -0.656639 | 1.749339  | 0.029401  |
| O | 0.230574  | 1.942447  | 0.876458  |
| O | -1.283038 | 2.671849  | -0.512861 |
| C | 2.043047  | 0.035526  | -0.097824 |
| H | 2.207393  | 0.816670  | 0.647003  |
| H | 1.724045  | 0.536818  | -1.014106 |
| C | 3.317199  | -0.768185 | -0.345504 |
| H | 4.128587  | -0.095844 | -0.633755 |
| H | 3.637318  | -1.294669 | 0.559842  |
| H | 3.182540  | -1.504116 | -1.142755 |
| C | -2.504259 | -2.014693 | 0.024028  |
| H | -2.911717 | -1.829317 | -0.977228 |
| H | -2.792384 | -3.020478 | 0.333033  |
| H | -2.948846 | -1.299928 | 0.717695  |

#### N-6

|   |           |           |           |
|---|-----------|-----------|-----------|
| N | 1.601848  | 0.487794  | -0.123022 |
| N | -0.326968 | 1.700351  | 0.092864  |
| C | 0.225047  | 0.475096  | -0.113628 |
| H | 2.025796  | 1.313330  | -0.523474 |
| H | 0.236552  | 2.352802  | 0.615821  |
| C | -0.448460 | -0.709864 | -0.344231 |
| H | 0.030240  | -1.537271 | -0.838771 |
| N | -1.754893 | -1.015818 | 0.089778  |
| O | -2.332325 | -0.278754 | 0.905982  |
| O | -2.257968 | -2.061255 | -0.347619 |
| C | 2.438975  | -0.708757 | -0.100059 |
| H | 2.431932  | -1.217175 | -1.073805 |
| H | 2.010171  | -1.400889 | 0.627764  |
| C | 3.871639  | -0.351729 | 0.284671  |
| H | 4.492129  | -1.250476 | 0.296989  |
| H | 4.316336  | 0.344293  | -0.433894 |
| H | 3.909019  | 0.106004  | 1.276002  |
| C | -1.654806 | 2.136964  | -0.314019 |
| H | -2.405364 | 1.947882  | 0.454220  |
| H | -1.608082 | 3.203648  | -0.544291 |
| H | -1.950651 | 1.601379  | -1.217201 |

#### N-7

|   |           |           |           |
|---|-----------|-----------|-----------|
| N | -1.482669 | -0.483740 | -0.317774 |
| N | -0.131363 | 1.374984  | -0.131841 |
| C | -0.230887 | 0.025985  | -0.090220 |
| H | -1.523277 | -1.464923 | -0.542836 |
| H | -0.826489 | 1.861951  | -0.675123 |
| C | 0.782696  | -0.872717 | 0.223855  |
| H | 0.547371  | -1.850277 | 0.611682  |
| N | 2.148816  | -0.693501 | -0.045846 |
| O | 2.531386  | 0.278198  | -0.724209 |
| O | 2.927186  | -1.557679 | 0.387378  |
| C | -2.748752 | 0.209388  | -0.086630 |
| H | -3.015206 | 0.834439  | -0.949515 |
| H | -2.630351 | 0.875641  | 0.773441  |
| C | -3.871199 | -0.791517 | 0.172015  |
| H | -4.816747 | -0.266477 | 0.323127  |
| H | -4.001076 | -1.467412 | -0.678465 |

|   |           |           |           |
|---|-----------|-----------|-----------|
| H | -3.665989 | -1.390314 | 1.062842  |
| C | 0.906760  | 2.186960  | 0.489039  |
| H | 1.752436  | 2.351886  | -0.178616 |
| H | 0.462299  | 3.139424  | 0.786223  |
| H | 1.273273  | 1.679120  | 1.381773  |

**N-8**

|   |           |           |           |
|---|-----------|-----------|-----------|
| N | -0.922575 | 0.467792  | 0.332865  |
| N | -1.208593 | -1.811827 | 0.136236  |
| C | -0.363864 | -0.733675 | 0.061762  |
| H | -1.754254 | 0.462770  | 0.904352  |
| H | -0.764714 | -2.713918 | 0.172980  |
| C | 0.944433  | -0.972943 | -0.343319 |
| H | 1.191534  | -1.864760 | -0.895754 |
| N | 2.068190  | -0.213463 | 0.020256  |
| O | 1.963981  | 0.697547  | 0.862271  |
| O | 3.149514  | -0.521179 | -0.505497 |
| C | -0.436660 | 1.780831  | -0.092000 |
| H | 0.149292  | 1.634020  | -1.001428 |
| H | 0.243301  | 2.190498  | 0.656798  |
| C | -1.609906 | 2.721231  | -0.353195 |
| H | -1.236242 | 3.706125  | -0.642318 |
| H | -2.254754 | 2.351512  | -1.155029 |
| H | -2.219885 | 2.856521  | 0.546311  |
| C | -2.652807 | -1.766107 | -0.038261 |
| H | -2.926273 | -1.070765 | -0.836373 |
| H | -3.001198 | -2.761112 | -0.316471 |
| H | -3.181093 | -1.475373 | 0.877321  |

**N-9**

|   |           |           |           |
|---|-----------|-----------|-----------|
| N | 1.161086  | -0.222416 | 0.338886  |
| N | 0.160218  | 1.802459  | -0.133179 |
| C | 0.063008  | 0.606052  | 0.294067  |
| H | 0.954796  | -1.212562 | 0.360165  |
| C | -1.196912 | -0.043583 | 0.881830  |
| H | -2.004341 | 0.665858  | 1.015008  |
| N | -1.729015 | -1.126748 | -0.030127 |
| O | -2.752637 | -0.897573 | -0.650331 |
| O | -1.078573 | -2.164466 | -0.093302 |
| C | 2.409240  | 0.160435  | -0.316964 |

|   |           |           |           |
|---|-----------|-----------|-----------|
| H | 2.725044  | 1.120226  | 0.096659  |
| H | 2.241176  | 0.326282  | -1.388997 |
| C | 3.476975  | -0.904722 | -0.095658 |
| H | 4.408600  | -0.610425 | -0.584259 |
| H | 3.680459  | -1.044607 | 0.969269  |
| H | 3.174432  | -1.868937 | -0.516638 |
| C | -0.932825 | 2.746641  | -0.172426 |
| H | -1.930913 | 2.338914  | 0.033987  |
| H | -0.740333 | 3.559840  | 0.536117  |
| H | -0.966993 | 3.199811  | -1.167197 |
| H | -0.955171 | -0.540092 | 1.820806  |

**N-10**

|   |           |           |           |
|---|-----------|-----------|-----------|
| N | 1.401985  | 0.287481  | 0.161105  |
| N | -0.392083 | 1.735475  | 0.222198  |
| C | 0.161636  | 0.488391  | 0.375563  |
| H | -1.396270 | 1.762528  | 0.118414  |
| C | -0.827489 | -0.554638 | 0.913998  |
| H | -1.331626 | -0.165853 | 1.798590  |
| N | -1.924391 | -0.853618 | -0.083474 |
| O | -2.751000 | 0.030886  | -0.280161 |
| O | -1.911267 | -1.940169 | -0.634244 |
| C | 2.053278  | -0.998991 | 0.354132  |
| H | 1.402140  | -1.848647 | 0.106296  |
| H | 2.335275  | -1.106470 | 1.411009  |
| C | 3.315452  | -1.081628 | -0.503397 |
| H | 3.829134  | -2.033890 | -0.342988 |
| H | 3.065431  | -0.999162 | -1.564007 |
| H | 4.000612  | -0.268427 | -0.253994 |
| C | 0.370126  | 2.809394  | -0.396569 |
| H | 0.681919  | 2.558612  | -1.416636 |
| H | -0.250539 | 3.705670  | -0.416106 |
| H | 1.269989  | 3.009679  | 0.186296  |
| H | -0.344532 | -1.500313 | 1.127199  |

**N-11**

|   |           |           |           |
|---|-----------|-----------|-----------|
| N | 1.135506  | 0.438114  | -0.083931 |
| N | 0.960038  | -1.925410 | -0.206686 |
| C | 0.471383  | -0.746164 | -0.321332 |
| C | -0.928850 | -0.668063 | -0.873673 |

|   |           |           |           |
|---|-----------|-----------|-----------|
| H | -1.238752 | -1.672798 | -1.154036 |
| N | -1.969635 | -0.196565 | 0.136484  |
| O | -3.046603 | 0.145359  | -0.325899 |
| O | -1.679662 | -0.212726 | 1.320427  |
| C | 0.522650  | 1.760696  | 0.063039  |
| H | 0.010025  | 1.849092  | 1.028107  |
| H | -0.232182 | 1.888315  | -0.716564 |
| C | 1.576623  | 2.855209  | -0.072944 |
| H | 1.116132  | 3.838582  | 0.046233  |
| H | 2.347302  | 2.758170  | 0.698270  |
| H | 2.062849  | 2.815447  | -1.050509 |
| C | 2.323818  | -2.060848 | 0.271081  |
| H | 2.462939  | -1.624971 | 1.273039  |
| H | 2.576040  | -3.119400 | 0.337650  |
| H | 3.049904  | -1.585751 | -0.405829 |
| H | -1.036604 | -0.000910 | -1.728025 |
| H | 2.017365  | 0.335205  | 0.397346  |

#### N-12

|   |           |           |           |
|---|-----------|-----------|-----------|
| N | -1.389317 | -0.526694 | -0.307352 |
| N | -0.202382 | 1.519349  | -0.128127 |
| C | -0.316044 | 0.168995  | -0.380862 |
| H | -1.002122 | 1.929080  | 0.329360  |
| C | 0.903172  | -0.551864 | -0.896671 |
| H | 1.408862  | -0.046449 | -1.718839 |
| N | 1.983047  | -0.777367 | 0.157032  |
| O | 1.699119  | -0.599994 | 1.329326  |
| O | 3.067579  | -1.147936 | -0.262746 |
| C | -2.613923 | 0.119983  | 0.138103  |
| H | -2.875349 | 0.952409  | -0.535808 |
| H | -2.475828 | 0.560154  | 1.140411  |
| C | -3.767470 | -0.877781 | 0.183341  |
| H | -4.689114 | -0.393823 | 0.518952  |
| H | -3.940847 | -1.305166 | -0.807036 |
| H | -3.536611 | -1.697301 | 0.867743  |
| C | 1.047741  | 2.249619  | 0.052626  |
| H | 1.752694  | 2.012365  | -0.745935 |
| H | 0.836546  | 3.317745  | -0.013579 |
| H | 1.526281  | 2.041866  | 1.015196  |
| H | 0.601608  | -1.548157 | -1.213193 |

#### N-13

|   |           |           |           |
|---|-----------|-----------|-----------|
| N | -1.541003 | 0.127140  | -0.000048 |
| N | 0.177609  | 1.658821  | -0.001042 |
| C | -0.275212 | 0.369358  | -0.000441 |
| H | 1.173634  | 1.812733  | 0.000300  |
| C | 0.737349  | -0.702782 | -0.000607 |
| H | 0.431498  | -1.735149 | -0.001262 |
| N | 2.028817  | -0.521493 | 0.000176  |
| O | 2.709215  | 0.523884  | 0.001264  |
| O | 2.775782  | -1.724616 | -0.000161 |
| C | -2.059582 | -1.232215 | 0.000115  |
| H | -1.715966 | -1.792337 | 0.883584  |
| H | -1.716045 | -1.792578 | -0.883239 |
| C | -3.586586 | -1.209099 | 0.000159  |
| H | -3.991921 | -2.225368 | 0.000312  |
| H | -3.960376 | -0.685525 | 0.883330  |
| H | -3.960434 | -0.685769 | -0.883132 |
| C | -0.740777 | 2.779014  | 0.000075  |
| H | -1.387417 | 2.758989  | 0.882379  |
| H | -0.159405 | 3.701451  | -0.000350 |
| H | -1.388961 | 2.759225  | -0.881065 |
| H | 3.686314  | -1.386760 | 0.000915  |

#### N-14

|   |           |           |           |
|---|-----------|-----------|-----------|
| N | -1.514297 | 0.137503  | -0.032370 |
| N | 0.204631  | 1.652558  | -0.185111 |
| C | -0.248706 | 0.358856  | -0.110583 |
| H | 1.182731  | 1.815456  | -0.020737 |
| C | 0.725409  | -0.747937 | -0.205309 |
| H | 0.360928  | -1.730751 | -0.458956 |
| N | 2.018429  | -0.755152 | -0.012997 |
| O | 2.812093  | -1.703104 | -0.113517 |
| O | 2.615806  | 0.474161  | 0.380996  |
| C | -2.063082 | -1.209899 | -0.005709 |
| H | -1.624208 | -1.807880 | 0.806515  |
| H | -1.845589 | -1.743621 | -0.944360 |
| C | -3.577274 | -1.154210 | 0.183502  |
| H | -4.004535 | -2.161283 | 0.200013  |
| H | -3.826801 | -0.655961 | 1.123472  |

|             |           |           |           |   |           |           |           |
|-------------|-----------|-----------|-----------|---|-----------|-----------|-----------|
| H           | -4.043695 | -0.591710 | -0.628858 | O | -2.477885 | 0.347266  | 0.479748  |
| C           | -0.715971 | 2.764398  | -0.030190 | C | 2.297841  | -0.971739 | -0.539611 |
| H           | -1.222628 | 2.745718  | 0.941178  | H | 3.188396  | -0.734294 | -1.128629 |
| H           | -0.151782 | 3.692782  | -0.128037 | H | 1.633890  | -1.593213 | -1.138745 |
| H           | -1.486612 | 2.729777  | -0.802502 | C | 2.676902  | -1.699158 | 0.749394  |
| H           | 3.555396  | 0.227410  | 0.395519  | H | 3.229864  | -2.612689 | 0.512953  |
| <b>N-16</b> |           |           |           | H | 3.307559  | -1.079035 | 1.393647  |
| N           | 1.595346  | 0.294554  | -0.302428 | H | 1.776611  | -1.977022 | 1.301055  |
| N           | -0.251639 | 1.644409  | 0.034012  | C | 0.497746  | 2.885678  | 0.057431  |
| C           | 0.257564  | 0.420003  | -0.167379 | H | 1.051033  | 3.035353  | -0.876235 |
| H           | -1.252470 | 1.620139  | 0.254264  | H | -0.202534 | 3.712102  | 0.170721  |
| C           | -0.539533 | -0.773188 | -0.324719 | H | 1.202864  | 2.925144  | 0.897337  |
| N           | -1.789279 | -0.627417 | -0.008460 | H | 2.167806  | 1.107850  | -0.136048 |
| O           | -2.603934 | -1.763261 | -0.230554 | H | -3.472582 | -1.426772 | 0.043572  |

**S2.** Cartesian coordinates of various microsolvated water clusters of **N-1**, **N-10** and **N-13** in the presence of 1-4 water molecules at M06-2X/6-31+G(d,p) level

|               |           |           |           |                 |           |           |           |
|---------------|-----------|-----------|-----------|-----------------|-----------|-----------|-----------|
| <b>N-1-1w</b> |           |           |           | H               | 0.491587  | -2.705011 | 0.818578  |
| N             | 1.726262  | -0.434721 | -0.022430 | H               | -1.014620 | -3.106884 | -0.029643 |
| N             | -0.450260 | -1.150196 | -0.249299 | H               | 0.487168  | -2.915778 | -0.957210 |
| C             | 0.402451  | -0.123851 | -0.122731 | O               | -3.278223 | -1.705794 | 0.330670  |
| H             | -1.437044 | -0.917391 | -0.292525 | H               | -3.349445 | -0.751593 | 0.483019  |
| C             | 0.022367  | 1.223057  | -0.066768 | H               | -4.096220 | -1.967132 | -0.102086 |
| H             | 0.738167  | 2.023230  | -0.014748 | H               | 1.998623  | -1.357267 | -0.329149 |
| N             | -1.289851 | 1.656182  | -0.037153 | <b>N-1-1w-a</b> |           |           |           |
| O             | -2.227402 | 0.825419  | -0.116510 | N               | -2.057018 | 0.052241  | -0.001967 |
| O             | -1.507285 | 2.863173  | 0.059121  | N               | -0.368882 | 1.625862  | 0.010417  |
| C             | 2.787746  | 0.558092  | 0.052289  | C               | -0.728744 | 0.331570  | -0.007276 |
| H             | 2.608319  | 1.192275  | 0.926683  | H               | -2.694595 | 0.809861  | 0.190542  |
| H             | 2.775744  | 1.203365  | -0.836420 | H               | 0.635467  | 1.778509  | -0.020147 |
| C             | 4.133755  | -0.137948 | 0.181137  | C               | 0.186840  | -0.728613 | -0.042495 |
| H             | 4.933698  | 0.601514  | 0.254307  | H               | -0.116236 | -1.759850 | -0.028299 |
| H             | 4.162258  | -0.764324 | 1.077012  | N               | 1.553190  | -0.553700 | -0.093214 |
| H             | 4.338540  | -0.765201 | -0.692639 | O               | 2.045420  | 0.602550  | -0.112569 |
| C             | -0.085745 | -2.541190 | -0.098803 | O               | 2.272535  | -1.555934 | -0.116275 |





|   |           |           |           |
|---|-----------|-----------|-----------|
| O | 2.061128  | -1.227377 | -1.249417 |
| C | -2.668936 | -1.256845 | -0.085373 |
| H | -2.069233 | -1.906195 | 0.563784  |
| H | -2.563426 | -1.615339 | -1.115177 |
| C | -4.130802 | -1.291768 | 0.330614  |
| H | -4.514426 | -2.311570 | 0.264819  |
| H | -4.252523 | -0.955065 | 1.364943  |
| H | -4.738381 | -0.657347 | -0.321257 |
| C | -1.408215 | 2.735712  | 0.543705  |
| H | -1.721619 | 2.453961  | 1.556678  |
| H | -0.856278 | 3.671986  | 0.611895  |
| H | -2.294978 | 2.912045  | -0.076647 |
| O | 1.844137  | -1.438175 | 1.764084  |
| H | 2.592390  | -0.819715 | 1.711037  |
| H | 1.913254  | -1.937263 | 0.941236  |
| O | 3.982030  | 0.237623  | 0.801316  |
| H | 4.581650  | -0.369591 | 0.355973  |
| H | 3.401833  | 0.580333  | 0.099180  |

**N-1-2w-b**

|   |           |           |           |
|---|-----------|-----------|-----------|
| N | -1.144046 | 0.374762  | -0.020842 |
| N | -0.442694 | -1.827912 | 0.015713  |
| C | -0.132124 | -0.520901 | -0.019670 |
| H | -2.104144 | 0.048268  | -0.052498 |
| H | 0.363513  | -2.446313 | 0.016499  |
| C | 1.188620  | -0.042869 | -0.050567 |
| H | 1.410637  | 1.008893  | -0.087770 |
| N | 2.292699  | -0.858306 | -0.023331 |
| O | 2.179275  | -2.102782 | 0.005472  |
| O | 3.419799  | -0.325093 | -0.029682 |
| C | -0.926437 | 1.815713  | -0.051604 |
| H | -0.391201 | 2.092148  | -0.968348 |
| H | -0.291368 | 2.105979  | 0.792962  |
| C | -2.258695 | 2.544665  | 0.018426  |
| H | -2.092716 | 3.623465  | -0.008871 |
| H | -2.898003 | 2.273322  | -0.826922 |
| H | -2.781733 | 2.305977  | 0.950460  |
| C | -1.794302 | -2.334342 | 0.068669  |
| H | -2.354577 | -2.083644 | -0.841276 |
| H | -1.746865 | -3.419448 | 0.154054  |

|   |           |           |           |
|---|-----------|-----------|-----------|
| H | -2.341575 | -1.938378 | 0.931533  |
| O | 3.043179  | 2.476068  | 0.085501  |
| H | 3.391806  | 1.566157  | 0.060287  |
| H | 3.786092  | 3.061758  | -0.081769 |
| O | -4.135257 | -0.132606 | -0.000578 |
| H | -4.663047 | 0.587591  | 0.360473  |
| H | -4.746879 | -0.703879 | -0.476817 |

**N-1-3w**

|   |           |           |           |
|---|-----------|-----------|-----------|
| N | 2.301392  | -0.122214 | -0.197516 |
| N | 0.954951  | -1.415963 | 1.154878  |
| C | 1.148783  | -0.795207 | -0.016618 |
| H | 2.935321  | -0.072013 | 0.586101  |
| H | 0.035289  | -1.834061 | 1.245108  |
| C | 0.227337  | -0.845381 | -1.086566 |
| H | 0.484054  | -0.517301 | -2.078248 |
| N | -1.084721 | -1.167985 | -0.929162 |
| O | -1.540392 | -1.497676 | 0.211445  |
| O | -1.845306 | -1.102120 | -1.905959 |
| C | 2.514567  | 0.845396  | -1.270292 |
| H | 1.630438  | 1.488223  | -1.343209 |
| H | 2.635942  | 0.318485  | -2.223562 |
| C | 3.755992  | 1.671258  | -0.972175 |
| H | 3.924168  | 2.395340  | -1.771622 |
| H | 3.638100  | 2.224046  | -0.035407 |
| H | 4.643903  | 1.035529  | -0.900311 |
| C | 1.690097  | -1.070855 | 2.358234  |
| H | 1.651336  | 0.011288  | 2.529504  |
| H | 1.213393  | -1.571162 | 3.200122  |
| H | 2.727136  | -1.421167 | 2.308937  |
| O | -3.744551 | 0.271544  | -0.260652 |
| H | -3.562403 | 0.114328  | -1.197444 |
| H | -3.292036 | -0.478461 | 0.159152  |
| O | -0.420011 | 1.108659  | 1.464738  |
| H | -1.027357 | 1.849114  | 1.289251  |
| H | -0.968275 | 0.327632  | 1.304965  |
| O | -2.636934 | 2.625258  | 0.642936  |
| H | -3.272028 | 3.150583  | 1.136972  |
| H | -3.121452 | 1.846155  | 0.296735  |

| <b>N-1-3w-a</b> |           |           |           | <b>N-1-4w</b> |           |           |           |
|-----------------|-----------|-----------|-----------|---------------|-----------|-----------|-----------|
| N               | 1.836367  | -0.303979 | 0.016907  | N             | -1.595242 | -0.669047 | -0.332877 |
| N               | -0.124175 | 0.896420  | -0.122260 | O             | -1.980208 | 0.507023  | -0.554532 |
| C               | 0.484232  | -0.293005 | -0.067708 | O             | -2.416983 | -1.600368 | -0.275551 |
| H               | 2.340071  | 0.576469  | 0.039152  | C             | 2.412293  | -1.757395 | 0.266265  |
| H               | -1.140385 | 0.910987  | -0.194685 | H             | 2.071532  | -2.377632 | -0.571158 |
| C               | -0.193095 | -1.531285 | -0.080301 | H             | 1.920162  | -2.125588 | 1.174957  |
| H               | 0.323592  | -2.469836 | 0.004593  | C             | 3.921686  | -1.867362 | 0.410965  |
| N               | -1.556056 | -1.659878 | -0.130446 | H             | 4.199699  | -2.906491 | 0.598724  |
| O               | -2.274982 | -0.630316 | -0.255663 | H             | 4.425167  | -1.538047 | -0.502768 |
| O               | -2.060305 | -2.783742 | -0.053757 | H             | 4.281631  | -1.255948 | 1.242679  |
| C               | 2.632936  | -1.519029 | 0.070794  | C             | 1.524212  | 2.346966  | -0.363896 |
| H               | 2.412608  | -2.141610 | -0.804935 | H             | 2.294717  | 2.169209  | -1.121175 |
| H               | 2.368385  | -2.098976 | 0.963909  | H             | 1.041703  | 3.300625  | -0.573551 |
| C               | 4.112962  | -1.169768 | 0.099480  | H             | 2.012524  | 2.413569  | 0.615561  |
| H               | 4.711352  | -2.082312 | 0.138619  | O             | -5.149982 | -0.687496 | -0.091156 |
| H               | 4.394319  | -0.615357 | -0.801481 | H             | -5.507759 | -1.406827 | 0.437188  |
| H               | 4.351623  | -0.562038 | 0.977047  | H             | -4.232716 | -0.945584 | -0.289328 |
| C               | 0.566205  | 2.162949  | -0.039091 | O             | 4.522070  | 1.353562  | 0.145897  |
| H               | 1.260290  | 2.304119  | -0.876806 | H             | 4.855927  | 1.850790  | 0.900217  |
| H               | -0.199441 | 2.937942  | -0.064150 | H             | 5.279855  | 1.191003  | -0.425818 |
| H               | 1.127520  | 2.249850  | 0.900604  | O             | -4.140103 | 1.747708  | 1.081108  |
| O               | 3.769343  | 2.033002  | 0.128840  | H             | -3.352709 | 1.483541  | 0.588676  |
| H               | 3.662782  | 2.953997  | 0.389369  | H             | -4.785370 | 1.077816  | 0.808170  |
| H               | 4.700040  | 1.917160  | -0.089359 |               |           |           |           |
| O               | -4.569755 | 0.580405  | 0.471756  |               |           |           |           |
| H               | -4.998110 | 0.347203  | 1.299613  |               |           |           |           |
| H               | -3.964945 | -0.152257 | 0.246816  |               |           |           |           |
| O               | -2.592898 | 2.419713  | -0.222422 |               |           |           |           |
| H               | -3.317451 | 1.895855  | 0.172525  |               |           |           |           |
| H               | -2.915870 | 2.649190  | -1.099319 |               |           |           |           |
| <b>N-1-3w-b</b> |           |           |           |               |           |           |           |
| N               | 2.027055  | -0.372551 | 0.028171  | N             | -2.684163 | 0.432462  | 0.104512  |
| N               | 0.507946  | 1.318857  | -0.380742 | N             | -0.622133 | 1.409077  | -0.195712 |
| C               | 0.749597  | 0.017765  | -0.172427 | C             | -1.379385 | 0.314108  | -0.244088 |
| H               | 2.767288  | 0.322389  | 0.047313  | H             | -2.990118 | 1.318545  | 0.476650  |
| H               | -0.473541 | 1.544640  | -0.519083 | H             | 0.364452  | 1.335492  | -0.451217 |
| C               | -0.271082 | -0.957200 | -0.154721 | C             | -0.918401 | -0.964624 | -0.635935 |
| H               | -0.075018 | -1.998354 | 0.024283  | H             | -1.549183 | -1.834522 | -0.604430 |
|                 |           |           |           | N             | 0.370308  | -1.233992 | -0.965842 |
|                 |           |           |           | O             | 1.217955  | -0.299010 | -1.054850 |
|                 |           |           |           | O             | 0.718136  | -2.411013 | -1.166673 |
|                 |           |           |           | C             | -3.627339 | -0.675297 | 0.186642  |
|                 |           |           |           | H             | -3.257304 | -1.427687 | 0.893533  |
|                 |           |           |           | H             | -3.712022 | -1.148878 | -0.797720 |
|                 |           |           |           | C             | -4.985579 | -0.156777 | 0.632688  |
|                 |           |           |           | H             | -5.699965 | -0.980140 | 0.690251  |

|   |           |           |           |
|---|-----------|-----------|-----------|
| H | -4.923225 | 0.303069  | 1.623924  |
| H | -5.373819 | 0.581348  | -0.075157 |
| C | -1.100977 | 2.704501  | 0.236606  |
| H | -1.453767 | 2.680320  | 1.275656  |
| H | -0.255207 | 3.387787  | 0.172530  |
| H | -1.906430 | 3.072097  | -0.411367 |
| O | 1.917803  | 2.632475  | -0.497690 |
| H | 2.280201  | 2.661439  | -1.388556 |
| H | 2.634563  | 2.259826  | 0.056412  |
| O | 3.443629  | -1.157763 | 0.161766  |
| H | 3.995582  | -1.799304 | -0.296230 |
| H | 2.700112  | -0.930894 | -0.445657 |
| O | 3.973736  | 1.428341  | 0.909314  |
| H | 4.084758  | 1.518097  | 1.860005  |
| H | 3.923920  | 0.470174  | 0.716275  |
| O | 1.309169  | -2.458215 | 1.732119  |
| H | 0.988104  | -2.899102 | 0.935253  |
| H | 2.127931  | -2.030467 | 1.441768  |

**N-1-4w-a**

|   |           |           |           |
|---|-----------|-----------|-----------|
| N | 3.447663  | 0.092878  | 0.005239  |
| N | 1.687879  | 1.584274  | -0.029960 |
| C | 2.111838  | 0.311641  | -0.035700 |
| H | 4.055097  | 0.887111  | 0.136088  |
| H | 0.678314  | 1.690555  | -0.074721 |
| C | 1.248953  | -0.796552 | -0.087681 |
| H | 1.605407  | -1.810384 | -0.069552 |
| N | -0.117467 | -0.691106 | -0.154158 |
| O | -0.667500 | 0.438021  | -0.179275 |
| O | -0.784883 | -1.732445 | -0.188303 |
| C | 4.065782  | -1.226217 | 0.043172  |
| H | 3.761494  | -1.789277 | -0.845990 |
| H | 3.715133  | -1.774866 | 0.925865  |
| C | 5.579178  | -1.082358 | 0.078429  |
| H | 6.047670  | -2.067968 | 0.103633  |
| H | 5.942675  | -0.556697 | -0.809398 |
| H | 5.901162  | -0.535298 | 0.970005  |
| C | 2.563961  | 2.734255  | -0.000057 |
| H | 3.233033  | 2.754052  | -0.868530 |
| H | 1.946484  | 3.630625  | -0.028270 |

|   |           |           |           |
|---|-----------|-----------|-----------|
| H | 3.160432  | 2.767021  | 0.920019  |
| O | -3.308381 | 1.639558  | -0.146378 |
| H | -3.666035 | 1.386628  | 0.725858  |
| H | -2.447866 | 1.193995  | -0.187616 |
| O | -3.663337 | -1.697336 | 0.241412  |
| H | -2.712333 | -1.749737 | 0.055146  |
| H | -4.075897 | -1.323964 | -0.559591 |
| O | -4.090016 | 0.201565  | 2.098241  |
| H | -3.967972 | -0.591914 | 1.522477  |
| H | -4.897994 | 0.068380  | 2.600067  |
| O | -4.621004 | -0.052761 | -1.808425 |
| H | -5.505983 | 0.199589  | -2.083188 |
| H | -4.236658 | 0.702400  | -1.307296 |

**N-1-4w-b**

|   |           |           |           |
|---|-----------|-----------|-----------|
| N | 2.347210  | -0.206817 | -0.065299 |
| N | 0.963893  | -1.487922 | -1.394232 |
| C | 1.204754  | -0.336720 | -0.758690 |
| H | 2.960652  | -1.006840 | -0.015608 |
| H | 0.044362  | -1.533314 | -1.820362 |
| C | 0.329830  | 0.780413  | -0.800246 |
| H | 0.638641  | 1.749195  | -0.444202 |
| N | -0.974179 | 0.683819  | -1.131492 |
| O | -1.478902 | -0.412494 | -1.528463 |
| O | -1.714974 | 1.690093  | -1.014916 |
| C | 2.630015  | 0.903059  | 0.845905  |
| H | 1.765574  | 1.050308  | 1.501825  |
| H | 2.773513  | 1.824109  | 0.270607  |
| C | 3.876692  | 0.587539  | 1.656385  |
| H | 4.096054  | 1.413401  | 2.335581  |
| H | 3.733167  | -0.315313 | 2.257700  |
| H | 4.745486  | 0.446403  | 1.005695  |
| C | 1.652999  | -2.722945 | -1.068406 |
| H | 1.591230  | -2.916671 | 0.008686  |
| H | 1.155884  | -3.536807 | -1.594094 |
| H | 2.696191  | -2.698011 | -1.402422 |
| O | -3.736771 | 0.012220  | 0.170883  |
| H | -3.484072 | 0.944426  | 0.125838  |
| H | -3.264358 | -0.357725 | -0.592759 |
| O | -0.561678 | -1.863267 | 1.012054  |

|   |           |           |           |
|---|-----------|-----------|-----------|
| H | -1.196320 | -1.786330 | 1.745585  |
| H | -1.077291 | -1.583694 | 0.242781  |
| O | -2.883029 | -1.242999 | 2.478090  |
| H | -3.574595 | -1.785221 | 2.866512  |
| H | -3.284682 | -0.770938 | 1.719388  |
| O | -0.090518 | 3.673737  | 0.221662  |
| H | -0.835067 | 3.200349  | -0.187686 |
| H | -0.281605 | 4.612717  | 0.149932  |

**N-1-4w-c**

|   |           |           |           |
|---|-----------|-----------|-----------|
| N | 3.667811  | -0.106874 | -0.024668 |
| N | 2.224684  | 1.693129  | 0.010888  |
| C | 2.399008  | 0.363042  | 0.018782  |
| H | 4.423414  | 0.558525  | 0.032906  |
| H | 1.251746  | 1.986484  | 0.029709  |
| C | 1.339234  | -0.559310 | 0.060911  |
| H | 1.498156  | -1.622190 | 0.076364  |
| N | 0.015731  | -0.197184 | 0.075697  |
| O | -0.312369 | 1.021120  | 0.069280  |
| O | -0.843507 | -1.083333 | 0.097464  |
| C | 4.025307  | -1.519490 | 0.011225  |
| H | 3.551158  | -2.029014 | -0.834850 |
| H | 3.645144  | -1.973305 | 0.934579  |
| C | 5.536267  | -1.669086 | -0.067708 |
| H | 5.808392  | -2.725816 | -0.042507 |
| H | 5.923681  | -1.241917 | -0.997200 |
| H | 6.025236  | -1.177007 | 0.778732  |
| C | 3.301158  | 2.654725  | -0.077995 |
| H | 3.895752  | 2.510763  | -0.988067 |
| H | 2.863071  | 3.650996  | -0.116064 |
| H | 3.959881  | 2.611168  | 0.798078  |
| O | -5.225026 | 0.330550  | 1.481192  |
| H | -5.739904 | 0.362947  | 0.657323  |
| H | -4.857055 | -0.565651 | 1.470710  |
| O | -3.156354 | 0.979512  | -0.289343 |
| H | -3.660850 | 1.106142  | 0.533547  |
| H | -2.218784 | 1.158922  | -0.115299 |
| O | -5.602915 | -0.052357 | -1.363579 |
| H | -5.235241 | -0.931494 | -1.188565 |
| H | -4.814880 | 0.503917  | -1.456268 |

|   |           |           |           |
|---|-----------|-----------|-----------|
| O | -3.732969 | -1.718180 | 0.045654  |
| H | -3.092131 | -2.431650 | 0.123200  |
| H | -3.205081 | -0.913102 | -0.126388 |

**N-10-1w**

|   |           |           |           |
|---|-----------|-----------|-----------|
| N | 1.834905  | 0.410584  | 0.005641  |
| N | -0.313100 | 1.222220  | -0.087385 |
| C | 0.573707  | 0.199839  | -0.039874 |
| H | -1.316583 | 1.080683  | -0.021796 |
| C | 0.017405  | -1.226083 | -0.089952 |
| H | 0.391648  | -1.801279 | 0.757499  |
| N | -1.467575 | -1.268554 | 0.003916  |
| O | -1.958130 | -1.207570 | 1.119213  |
| O | -2.103651 | -1.316684 | -1.033394 |
| C | 2.755954  | -0.712338 | 0.026606  |
| H | 2.613796  | -1.367881 | -0.849048 |
| H | 2.596277  | -1.339768 | 0.919520  |
| C | 4.190416  | -0.203117 | 0.033507  |
| H | 4.902288  | -1.033316 | 0.057011  |
| H | 4.379471  | 0.398440  | -0.859356 |
| H | 4.357836  | 0.430472  | 0.908384  |
| C | 0.169191  | 2.586804  | -0.025883 |
| H | 0.834021  | 2.794152  | -0.869358 |
| H | -0.693595 | 3.252413  | -0.061406 |
| H | 0.735598  | 2.760319  | 0.895152  |
| H | 0.281564  | -1.700783 | -1.035493 |
| O | -3.269736 | 1.135635  | 0.067677  |
| H | -3.590795 | 0.702468  | -0.732029 |
| H | -3.459039 | 0.512643  | 0.781322  |

**N-10-1w-a**

|   |           |           |           |
|---|-----------|-----------|-----------|
| N | 0.905328  | -0.281961 | 0.272449  |
| N | -0.246355 | 1.717793  | 0.442703  |
| C | -0.176673 | 0.359862  | 0.508453  |
| H | -1.172702 | 2.108610  | 0.336547  |
| C | -1.490641 | -0.291773 | 0.936514  |
| H | -1.979826 | 0.302421  | 1.708787  |
| N | -2.427589 | -0.308276 | -0.234942 |
| O | -2.943801 | 0.754803  | -0.533936 |
| O | -2.586768 | -1.361565 | -0.815886 |

|   |           |           |           |
|---|-----------|-----------|-----------|
| C | 0.936526  | -1.739280 | 0.381611  |
| H | 0.125355  | -2.196585 | -0.201029 |
| H | 0.803625  | -2.045184 | 1.429989  |
| C | 2.272553  | -2.269575 | -0.119556 |
| H | 2.304249  | -3.360119 | -0.051222 |
| H | 2.425625  | -1.985528 | -1.165087 |
| H | 3.093339  | -1.862577 | 0.478583  |
| C | 0.874164  | 2.487620  | -0.072529 |
| H | 1.157091  | 2.169318  | -1.081756 |
| H | 0.590744  | 3.540010  | -0.082857 |
| H | 1.745614  | 2.358323  | 0.572852  |
| H | -1.360431 | -1.323283 | 1.249562  |
| O | 3.461890  | 0.911205  | -0.556737 |
| H | 2.630689  | 0.470810  | -0.294493 |
| H | 4.070796  | 0.214227  | -0.815829 |

**N-10-1w-b**

|   |           |           |           |
|---|-----------|-----------|-----------|
| N | 1.236948  | 1.142569  | -0.160696 |
| N | 2.092809  | -0.982356 | 0.141072  |
| C | 1.200732  | -0.098111 | -0.430230 |
| H | 1.738597  | -1.923859 | 0.248098  |
| C | 0.248586  | -0.777522 | -1.414676 |
| H | 0.651302  | -1.735975 | -1.743148 |
| N | -1.030569 | -1.087978 | -0.702551 |
| O | -0.976701 | -1.940703 | 0.168630  |
| O | -2.027075 | -0.463972 | -1.010228 |
| C | 0.300120  | 2.092862  | -0.729832 |
| H | -0.279650 | 1.694182  | -1.575014 |
| H | 0.880932  | 2.941895  | -1.106067 |
| C | -0.665029 | 2.573218  | 0.353134  |
| H | -1.354583 | 3.317760  | -0.055274 |
| H | -1.246295 | 1.737763  | 0.756536  |
| H | -0.108393 | 3.025192  | 1.177899  |
| C | 2.928289  | -0.499330 | 1.227963  |
| H | 2.331067  | -0.097536 | 2.055093  |
| H | 3.549841  | -1.323684 | 1.579497  |
| H | 3.568595  | 0.303015  | 0.857980  |
| H | -0.006778 | -0.150421 | -2.263729 |
| O | -2.586416 | -0.094450 | 1.863508  |
| H | -3.024270 | -0.095211 | 1.004290  |

|   |           |           |          |
|---|-----------|-----------|----------|
| H | -2.149340 | -0.952469 | 1.905619 |
|---|-----------|-----------|----------|

**N-10-2w**

|   |           |           |           |
|---|-----------|-----------|-----------|
| N | 2.229912  | 0.418611  | -0.129733 |
| N | 0.058398  | 1.170358  | 0.001853  |
| C | 0.990232  | 0.192912  | 0.090785  |
| H | -0.886394 | 1.068344  | 0.367262  |
| C | 0.491704  | -1.206247 | 0.470850  |
| H | 0.692797  | -1.413997 | 1.522941  |
| N | -0.978282 | -1.346644 | 0.285876  |
| O | -1.701843 | -1.052251 | 1.216157  |
| O | -1.375454 | -1.721338 | -0.809539 |
| C | 3.191646  | -0.668673 | -0.069100 |
| H | 3.004414  | -1.403773 | -0.869218 |
| H | 3.129763  | -1.216236 | 0.886209  |
| C | 4.601379  | -0.116306 | -0.228502 |
| H | 5.344565  | -0.918213 | -0.192500 |
| H | 4.691050  | 0.406660  | -1.184074 |
| H | 4.815755  | 0.600116  | 0.568775  |
| C | 0.470497  | 2.522709  | -0.314834 |
| H | 0.966189  | 2.547465  | -1.289289 |
| H | -0.424488 | 3.144864  | -0.333867 |
| H | 1.179107  | 2.905195  | 0.428057  |
| H | 0.948365  | -1.954590 | -0.175531 |
| O | -2.699530 | 1.665197  | 0.616522  |
| H | -3.231204 | 1.054185  | 0.070608  |
| H | -3.020218 | 1.553327  | 1.516852  |
| O | -3.907383 | -0.301269 | -0.937900 |
| H | -4.150328 | -0.144741 | -1.855544 |
| H | -3.228647 | -0.993962 | -0.943763 |

**N-10-2w-a**

|   |           |           |           |
|---|-----------|-----------|-----------|
| N | -1.149599 | -0.155421 | -0.114549 |
| N | 0.204523  | 1.683778  | -0.471915 |
| C | -0.020430 | 0.346203  | -0.462492 |
| H | 1.169872  | 1.990304  | -0.488835 |
| C | 1.169816  | -0.474664 | -0.944206 |
| H | 1.982542  | 0.166958  | -1.290063 |
| N | 1.746142  | -1.263890 | 0.198164  |
| O | 2.131134  | -0.628740 | 1.169556  |

|                  |           |           |           |                |           |           |           |
|------------------|-----------|-----------|-----------|----------------|-----------|-----------|-----------|
| O                | 1.803099  | -2.468641 | 0.090505  | H              | 3.058140  | 2.643216  | 0.999864  |
| C                | -1.344379 | -1.600143 | -0.120884 | H              | 1.507386  | 3.331452  | 0.456094  |
| H                | -0.871468 | -2.042801 | 0.767232  | H              | -0.043772 | -0.159880 | -2.144815 |
| H                | -0.878804 | -2.080566 | -0.994455 | O              | -2.442095 | -1.892658 | 1.544024  |
| C                | -2.830923 | -1.930571 | -0.105215 | H              | -1.530741 | -2.002773 | 1.838267  |
| H                | -2.986086 | -3.012441 | -0.132321 | H              | -2.479503 | -2.361671 | 0.702360  |
| H                | -3.296573 | -1.540600 | 0.804603  | O              | 3.149256  | -1.351543 | 0.097456  |
| H                | -3.329562 | -1.486277 | -0.972309 | H              | 2.440624  | -1.722501 | 0.642116  |
| C                | -0.798593 | 2.602579  | 0.033601  | H              | 3.955723  | -1.834818 | 0.300799  |
| H                | -1.093115 | 2.348976  | 1.058289  |                |           |           |           |
| H                | -0.382440 | 3.609991  | 0.010356  |                |           |           |           |
| H                | -1.698131 | 2.570465  | -0.585357 |                |           |           |           |
| H                | 0.891749  | -1.200926 | -1.705402 |                |           |           |           |
| O                | -3.571156 | 1.353171  | 0.543986  |                |           |           |           |
| H                | -2.775359 | 0.819397  | 0.349094  |                |           |           |           |
| H                | -4.325269 | 0.769988  | 0.422353  |                |           |           |           |
| O                | 3.132665  | 1.757219  | -0.025988 |                |           |           |           |
| H                | 3.054571  | 1.166647  | 0.737631  |                |           |           |           |
| H                | 3.911732  | 2.305114  | 0.107984  |                |           |           |           |
| <b>N-10-2w-b</b> |           |           |           | <b>N-10-3w</b> |           |           |           |
| N                | -0.462771 | 1.525805  | 0.085067  | N              | 1.949129  | -0.211774 | -0.038026 |
| N                | 1.836429  | 1.332560  | -0.043696 | N              | -0.007676 | 0.989620  | 0.188466  |
| C                | 0.566224  | 0.901655  | -0.331493 | C              | 0.672161  | -0.166265 | 0.120879  |
| H                | 2.557813  | 0.620581  | -0.035063 | H              | -1.017162 | 1.029952  | 0.325378  |
| C                | 0.541512  | -0.323083 | -1.241565 | C              | -0.124646 | -1.461316 | 0.289650  |
| H                | 1.551363  | -0.661805 | -1.483604 | H              | 0.060303  | -1.899938 | 1.270737  |
| N                | -0.100728 | -1.479736 | -0.534635 | N              | -1.599148 | -1.263283 | 0.190031  |
| O                | 0.364553  | -1.801954 | 0.551967  | O              | -2.246057 | -1.227782 | 1.217120  |
| O                | -1.032828 | -2.040009 | -1.069977 | O              | -2.063099 | -1.140873 | -0.934100 |
| C                | -1.802475 | 1.088632  | -0.276743 | C              | 2.620923  | -1.502024 | -0.099172 |
| H                | -2.132615 | 0.316183  | 0.432579  | H              | 2.294742  | -2.074485 | -0.982436 |
| H                | -1.844340 | 0.635284  | -1.280771 | H              | 2.392263  | -2.119753 | 0.784407  |
| C                | -2.763307 | 2.269094  | -0.221246 | C              | 4.128550  | -1.305262 | -0.178681 |
| H                | -3.782537 | 1.950918  | -0.457854 | H              | 4.644865  | -2.268160 | -0.220173 |
| H                | -2.756769 | 2.708160  | 0.779465  | H              | 4.387390  | -0.735774 | -1.076189 |
| H                | -2.462542 | 3.042968  | -0.933480 | H              | 4.485042  | -0.757317 | 0.698665  |
| C                | 1.993052  | 2.445782  | 0.871786  | C              | 0.676189  | 2.263743  | 0.057726  |
| H                | 1.530138  | 2.241106  | 1.844705  | H              | 1.190339  | 2.335140  | -0.905530 |
|                  |           |           |           | H              | -0.075384 | 3.049390  | 0.134332  |
|                  |           |           |           | H              | 1.426532  | 2.391205  | 0.843478  |
|                  |           |           |           | H              | 0.131181  | -2.160671 | -0.506659 |
|                  |           |           |           | O              | -2.736798 | 1.638411  | 0.711787  |
|                  |           |           |           | H              | -3.022075 | 1.267597  | 1.553715  |
|                  |           |           |           | H              | -3.432836 | 1.393519  | 0.074011  |
|                  |           |           |           | O              | -4.463385 | 0.407258  | -1.082228 |
|                  |           |           |           | H              | -5.367765 | 0.092382  | -0.998864 |
|                  |           |           |           | H              | -3.886297 | -0.368049 | -1.147840 |
|                  |           |           |           | O              | 3.729849  | 2.094761  | -0.269439 |
|                  |           |           |           | H              | 3.156654  | 1.305385  | -0.196835 |

H 4.632922 1.770186 -0.321021

**N-10-3w-a**

N -2.620713 0.426432 0.000077  
N -0.452193 1.195506 -0.000937  
C -1.359702 0.198642 -0.000556  
H 0.559554 1.050254 -0.000678  
C -0.835680 -1.241369 -0.001308  
H -1.169773 -1.759084 -0.900996  
N 0.650277 -1.334752 -0.000373  
O 1.212820 -1.366020 -1.080495  
O 1.211359 -1.366693 1.080503  
C -3.558018 -0.681763 0.000325  
H -3.419570 -1.326903 0.884927  
H -3.419567 -1.327475 -0.883861  
C -4.984630 -0.150432 0.000145  
H -5.709985 -0.969355 0.000520  
H -5.152383 0.470673 0.883864  
H -5.152457 0.469918 -0.884092  
C -0.902275 2.571861 -0.000192  
H -1.514203 2.778954 0.883651  
H -0.017610 3.208906 -0.000360  
H -1.514991 2.779593 -0.883329  
H -1.170941 -1.760445 0.897152  
O 2.345349 1.411367 0.000250  
H 2.869008 1.148618 0.775480  
H 2.870064 1.148641 -0.774268  
O 3.592826 -0.016883 2.073139  
H 3.555056 0.102408 3.026616  
H 2.982375 -0.734175 1.854552  
O 3.595526 -0.016868 -2.071341  
H 2.985167 -0.734212 -1.852690  
H 3.557436 0.102528 -3.024794

**N-10-3w-b**

N 2.279855 0.093691 0.036765  
N 1.351637 -1.903984 0.697734  
C 1.400075 -0.805994 -0.143774  
H 0.422623 -2.282550 0.824075  
C 0.475031 -0.912887 -1.348266

H 0.648234 -1.865985 -1.858828  
N -0.995945 -0.934682 -1.044489  
O -1.371256 -1.369148 0.037226  
O -1.745787 -0.574284 -1.923742  
C 2.477973 1.234942 -0.831639  
H 1.662816 1.399863 -1.547405  
H 3.399148 1.062249 -1.404250  
C 2.639923 2.491929 0.015946  
H 2.860853 3.357414 -0.616364  
H 1.714020 2.682474 0.563656  
H 3.454640 2.361652 0.732980  
C 2.171406 -1.871436 1.896724  
H 1.953290 -0.997567 2.522749  
H 1.991816 -2.788247 2.460502  
H 3.224329 -1.821052 1.614250  
H 0.591351 -0.093846 -2.048730  
O -2.455839 1.839230 1.706978  
H -2.453581 1.798059 2.666995  
H -3.102679 1.180712 1.382758  
O -3.920167 -0.116460 0.443654  
H -3.191221 -0.729991 0.257349  
H -4.259409 0.145695 -0.418638  
O -0.551885 1.600031 -0.286549  
H -0.932525 2.272890 -0.860304  
H -1.059509 1.678790 0.544649

**N-10-4w**

N -2.656254 0.573344 0.388316  
N -0.781138 1.900142 0.181617  
C -1.527094 0.814929 -0.160901  
H 0.202413 1.888318 -0.079010  
C -0.874212 -0.033260 -1.251916  
H -0.001287 0.472681 -1.670674  
N -0.348646 -1.288963 -0.626082  
O -0.822936 -2.353578 -0.954556  
O 0.544632 -1.151785 0.203065  
C -3.455601 -0.576010 0.007752  
H -3.209082 -1.416931 0.672021  
H -3.258902 -0.928610 -1.016524  
C -4.936780 -0.246884 0.150620



|   |           |           |           |
|---|-----------|-----------|-----------|
| H | -5.555139 | -1.115701 | -0.093581 |
| H | -5.153426 | 0.064805  | 1.175534  |
| H | -5.209614 | 0.575760  | -0.516514 |
| C | -1.208410 | 2.733997  | 1.283313  |
| H | -1.297749 | 2.158090  | 2.212534  |
| H | -0.480438 | 3.535416  | 1.414490  |
| H | -2.189828 | 3.164639  | 1.067864  |
| H | -1.574796 | -0.347035 | -2.021850 |
| O | 3.780741  | -0.721430 | 0.113444  |
| H | 3.454279  | -1.397635 | 0.741294  |
| H | 4.074160  | -1.208943 | -0.663962 |
| O | 2.487651  | -2.716960 | 1.457572  |
| H | 2.401938  | -3.006987 | 2.370047  |
| H | 1.602169  | -2.476119 | 1.140814  |
| O | 4.616177  | 1.872132  | -0.396973 |
| H | 4.575805  | 1.010770  | 0.050803  |
| H | 5.213193  | 2.435849  | 0.101856  |
| O | 1.894656  | 1.296717  | -0.840720 |
| H | 2.689554  | 1.848101  | -0.917085 |
| H | 2.224234  | 0.494462  | -0.402876 |

**N-10-4w-a**

|   |           |           |           |
|---|-----------|-----------|-----------|
| N | -2.384496 | 0.939965  | -0.031791 |
| N | -3.114990 | -1.237899 | -0.139382 |
| C | -2.203729 | -0.284001 | 0.260356  |
| H | -2.795308 | -2.194488 | -0.162428 |
| C | -1.065518 | -0.868514 | 1.085113  |
| H | -1.331733 | -1.815787 | 1.550372  |
| N | 0.122331  | -1.157532 | 0.219763  |
| O | 0.655729  | -2.251700 | 0.344577  |
| O | 0.502043  | -0.295639 | -0.543547 |
| C | -1.457631 | 1.978193  | 0.377007  |
| H | -0.595743 | 1.608517  | 0.950695  |
| H | -2.002788 | 2.677808  | 1.021946  |
| C | -0.961267 | 2.727372  | -0.857382 |
| H | -0.282972 | 3.537838  | -0.573015 |
| H | -0.441143 | 2.038649  | -1.532632 |
| H | -1.805527 | 3.151458  | -1.406904 |
| C | -4.168087 | -0.865978 | -1.064643 |
| H | -3.761121 | -0.437934 | -1.988222 |

|   |           |           |           |
|---|-----------|-----------|-----------|
| H | -4.761247 | -1.752141 | -1.293545 |
| H | -4.808631 | -0.111847 | -0.602926 |
| H | -0.676541 | -0.177413 | 1.835205  |
| O | 4.132585  | 0.546260  | -1.061861 |
| H | 4.445831  | 0.690409  | -1.958901 |
| H | 3.865227  | -0.394104 | -0.997854 |
| O | 3.337003  | -2.069097 | -0.776296 |
| H | 2.403445  | -2.133065 | -0.515140 |
| H | 3.829846  | -2.570998 | -0.119511 |
| O | 2.185093  | 2.024763  | 0.182621  |
| H | 1.434429  | 1.918453  | -0.414253 |
| H | 2.934967  | 1.587578  | -0.273668 |
| O | 1.376058  | 0.404701  | 2.201834  |
| H | 1.866214  | 0.537268  | 3.017752  |
| H | 1.752189  | 1.031332  | 1.541568  |

**N-10-4w-b**

|   |           |           |           |
|---|-----------|-----------|-----------|
| N | 3.140610  | 0.319427  | 0.017926  |
| N | 1.039145  | 1.230470  | -0.199151 |
| C | 1.871712  | 0.175647  | -0.072653 |
| H | 0.023379  | 1.149317  | -0.232971 |
| C | 1.246898  | -1.223710 | -0.080507 |
| H | 1.580428  | -1.784491 | 0.793126  |
| N | -0.239854 | -1.203469 | -0.006490 |
| O | -0.741658 | -1.084068 | 1.097157  |
| O | -0.860627 | -1.294839 | -1.050974 |
| C | 3.996989  | -0.846293 | 0.146451  |
| H | 3.837215  | -1.563295 | -0.676729 |
| H | 3.787158  | -1.389541 | 1.083342  |
| C | 5.457312  | -0.416333 | 0.145796  |
| H | 6.121407  | -1.279043 | 0.251875  |
| H | 5.695889  | 0.099772  | -0.787684 |
| H | 5.642737  | 0.276369  | 0.970646  |
| C | 1.582038  | 2.573381  | -0.204656 |
| H | 2.282718  | 2.702395  | -1.035230 |
| H | 0.748820  | 3.268729  | -0.308083 |
| H | 2.125999  | 2.776728  | 0.723549  |
| H | 1.500073  | -1.746240 | -1.003358 |
| O | -1.771370 | 1.602578  | -0.258800 |
| H | -2.359589 | 1.293567  | -0.965138 |

|   |           |           |           |
|---|-----------|-----------|-----------|
| H | -2.276602 | 1.502895  | 0.563197  |
| O | -3.343671 | -0.095783 | -1.887529 |
| H | -3.572255 | -0.200897 | -2.816462 |
| H | -2.676597 | -0.766001 | -1.675082 |
| O | -3.041600 | 0.435201  | 1.983759  |
| H | -2.410231 | -0.286364 | 1.842656  |
| H | -3.074063 | 0.607206  | 2.930127  |
| O | -5.241472 | -0.577708 | 0.312126  |
| H | -4.695295 | -0.173809 | 0.998984  |
| H | -4.787023 | -0.371492 | -0.515254 |

**N-13-1w**

|   |           |           |           |
|---|-----------|-----------|-----------|
| N | -2.130024 | 0.067396  | -0.002448 |
| N | -0.516737 | 1.696273  | -0.122769 |
| C | -0.885649 | 0.384099  | -0.071387 |
| H | 0.460940  | 1.915508  | -0.006310 |
| C | 0.186059  | -0.633589 | -0.143212 |
| H | -0.057196 | -1.678139 | -0.260825 |
| N | 1.458771  | -0.388862 | -0.076001 |
| O | 2.041352  | 0.719778  | 0.075117  |
| O | 2.262556  | -1.488638 | -0.191396 |
| C | -2.540408 | -1.326498 | 0.015253  |
| H | -2.066829 | -1.874196 | 0.845206  |
| H | -2.248019 | -1.838661 | -0.915701 |
| C | -4.052944 | -1.409914 | 0.168320  |
| H | -4.389318 | -2.450878 | 0.185185  |
| H | -4.363037 | -0.924319 | 1.097427  |
| H | -4.543740 | -0.893950 | -0.661053 |
| C | -1.524220 | 2.724047  | 0.009854  |
| H | -2.053482 | 2.643925  | 0.966664  |
| H | -1.037855 | 3.697576  | -0.062741 |
| H | -2.268609 | 2.626623  | -0.785055 |
| H | 3.188194  | -1.149742 | -0.038324 |
| O | 4.591599  | -0.289869 | 0.271395  |
| H | 5.328475  | -0.206219 | -0.341917 |
| H | 4.105320  | 0.549776  | 0.272083  |

**N-13-1w-a**

|   |           |           |           |
|---|-----------|-----------|-----------|
| N | 1.077942  | -0.336209 | 0.000157  |
| N | -0.272672 | 1.531231  | -0.000072 |

|   |           |           |           |
|---|-----------|-----------|-----------|
| C | -0.103788 | 0.188158  | -0.000017 |
| H | -1.213817 | 1.894482  | 0.000179  |
| C | -1.321585 | -0.652253 | -0.000173 |
| H | -1.252840 | -1.728307 | -0.000396 |
| N | -2.535243 | -0.190865 | -0.000014 |
| O | -2.962826 | 0.981172  | 0.000260  |
| O | -3.515820 | -1.166209 | -0.000139 |
| C | 1.236914  | -1.784278 | 0.000107  |
| H | 0.764813  | -2.235948 | -0.886088 |
| H | 0.764908  | -2.235953 | 0.886351  |
| C | 2.716256  | -2.145547 | 0.000015  |
| H | 2.850719  | -3.230682 | 0.000097  |
| H | 3.205563  | -1.736945 | -0.889358 |
| H | 3.205688  | -1.736799 | 0.889253  |
| C | 0.866064  | 2.426376  | -0.000059 |
| H | 1.493553  | 2.265517  | -0.882178 |
| H | 0.494904  | 3.451175  | -0.000311 |
| H | 1.493354  | 2.265858  | 0.882275  |
| H | -4.330416 | -0.633986 | -0.000024 |
| O | 3.622965  | 1.107442  | -0.000064 |
| H | 2.785357  | 0.601531  | 0.000082  |
| H | 4.330311  | 0.456976  | -0.000079 |

**N-13-1w-b**

|   |           |           |           |
|---|-----------|-----------|-----------|
| N | 1.790437  | -0.511942 | -0.021063 |
| N | -0.381415 | -1.246953 | -0.105661 |
| C | 0.530854  | -0.245223 | -0.051311 |
| H | -1.372946 | -1.057149 | -0.112358 |
| C | 0.033661  | 1.151093  | -0.023543 |
| H | 0.731429  | 1.973891  | 0.011857  |
| N | -1.209515 | 1.512507  | -0.028678 |
| O | -2.263551 | 0.835713  | -0.070087 |
| O | -1.409693 | 2.883009  | 0.011619  |
| C | 2.780801  | 0.547999  | 0.043464  |
| H | 2.645930  | 1.171442  | 0.942361  |
| H | 2.709632  | 1.219618  | -0.827632 |
| C | 4.175147  | -0.063118 | 0.077234  |
| H | 4.944151  | 0.713459  | 0.129540  |
| H | 4.275075  | -0.718549 | 0.946430  |
| H | 4.341919  | -0.665938 | -0.819360 |

|   |           |           |           |
|---|-----------|-----------|-----------|
| C | 0.054551  | -2.623457 | -0.078677 |
| H | 0.662629  | -2.819192 | 0.810914  |
| H | -0.835482 | -3.252889 | -0.065973 |
| H | 0.669722  | -2.856329 | -0.954404 |
| H | -2.379882 | 2.944650  | -0.008165 |
| O | -3.309406 | -1.798366 | 0.222145  |
| H | -3.434900 | -0.854164 | 0.382108  |
| H | -3.942695 | -2.040752 | -0.459925 |

**N-13-2w**

|   |           |           |           |
|---|-----------|-----------|-----------|
| N | -2.589638 | 0.117452  | 0.012725  |
| N | -0.896356 | 1.655847  | -0.157544 |
| C | -1.329345 | 0.367606  | -0.047018 |
| H | 0.081789  | 1.812075  | -0.345822 |
| C | -0.308747 | -0.701213 | 0.024011  |
| H | -0.606773 | -1.729114 | 0.161096  |
| N | 0.974917  | -0.531286 | -0.064416 |
| O | 1.604506  | 0.551170  | -0.257680 |
| O | 1.722756  | -1.652722 | 0.074042  |
| C | -3.071604 | -1.244186 | 0.170146  |
| H | -2.688555 | -1.699019 | 1.097601  |
| H | -2.740755 | -1.884723 | -0.662829 |
| C | -4.593652 | -1.242117 | 0.215444  |
| H | -4.985059 | -2.256663 | 0.335413  |
| H | -4.942843 | -0.628389 | 1.050059  |
| H | -4.996076 | -0.816114 | -0.707403 |
| C | -1.860860 | 2.722637  | -0.298552 |
| H | -2.524063 | 2.750208  | 0.570667  |
| H | -1.323018 | 3.668149  | -0.377962 |
| H | -2.488621 | 2.577544  | -1.185434 |
| H | 2.674220  | -1.420986 | -0.215375 |
| O | 4.174083  | -1.212548 | -0.518448 |
| H | 4.423069  | -1.107764 | -1.442369 |
| H | 4.410096  | -0.379139 | -0.053484 |
| O | 4.107904  | 1.133878  | 0.770463  |
| H | 4.248644  | 1.328735  | 1.701338  |
| H | 3.146740  | 1.116522  | 0.607948  |

**N-13-2w-a**

|   |          |           |           |
|---|----------|-----------|-----------|
| N | 1.667170 | -0.315730 | -0.020575 |
|---|----------|-----------|-----------|

|   |           |           |           |
|---|-----------|-----------|-----------|
| N | 0.244020  | 1.495607  | -0.040011 |
| C | 0.464126  | 0.159939  | -0.026200 |
| H | -0.712293 | 1.816248  | -0.036401 |
| C | -0.717428 | -0.729908 | -0.023251 |
| H | -0.598020 | -1.801377 | -0.035892 |
| N | -1.954848 | -0.334705 | -0.006369 |
| O | -2.405583 | 0.841446  | 0.010081  |
| O | -2.877705 | -1.339812 | -0.003912 |
| C | 1.883814  | -1.756147 | -0.007065 |
| H | 1.431982  | -2.234523 | -0.889788 |
| H | 1.427676  | -2.218075 | 0.882099  |
| C | 3.376282  | -2.058955 | -0.000911 |
| H | 3.553152  | -3.137977 | 0.010886  |
| H | 3.850701  | -1.641828 | -0.894615 |
| H | 3.848624  | -1.621009 | 0.883597  |
| C | 1.344522  | 2.436299  | -0.048342 |
| H | 1.990303  | 2.278483  | -0.917617 |
| H | 0.931404  | 3.444645  | -0.082000 |
| H | 1.967269  | 2.327558  | 0.845346  |
| H | -3.764682 | -0.878274 | -0.006038 |
| O | -5.069064 | 0.144079  | -0.032704 |
| H | -5.736424 | 0.194317  | 0.659166  |
| H | -4.512701 | 0.936145  | 0.027726  |
| O | 4.141591  | 1.229500  | 0.103005  |
| H | 3.327802  | 0.687701  | 0.049151  |
| H | 4.878996  | 0.622687  | -0.004077 |

**N-13-2w-b**

|   |           |           |           |
|---|-----------|-----------|-----------|
| N | 2.314792  | 0.058291  | 0.101285  |
| N | 0.514029  | 1.468405  | 0.272184  |
| C | 1.040027  | 0.237520  | 0.052178  |
| H | -0.476975 | 1.631376  | 0.177413  |
| C | 0.114578  | -0.875404 | -0.270224 |
| H | 0.509479  | -1.826556 | -0.593868 |
| N | -1.178596 | -0.836023 | -0.219492 |
| O | -1.928324 | 0.118728  | 0.141764  |
| O | -1.811410 | -1.981504 | -0.623616 |
| C | 2.895707  | -1.254303 | -0.119872 |
| H | 2.682422  | -1.621097 | -1.137298 |
| H | 2.489768  | -2.000050 | 0.582099  |

|   |           |           |           |
|---|-----------|-----------|-----------|
| C | 4.405442  | -1.176676 | 0.064174  |
| H | 4.872854  | -2.152711 | -0.097166 |
| H | 4.831760  | -0.459085 | -0.641664 |
| H | 4.641857  | -0.834630 | 1.075246  |
| C | 1.388880  | 2.601761  | 0.460435  |
| H | 2.086815  | 2.698528  | -0.378444 |
| H | 0.768524  | 3.495573  | 0.530524  |
| H | 1.984730  | 2.486174  | 1.371804  |
| H | -2.719913 | -1.919874 | -0.223331 |
| O | -4.102904 | -1.469675 | 0.663507  |
| H | -4.409427 | -1.889370 | 1.473444  |
| H | -3.704765 | -0.616447 | 0.897752  |
| O | -2.032469 | 2.789609  | -0.664381 |
| H | -2.415231 | 1.901908  | -0.692389 |
| H | -2.760427 | 3.416892  | -0.680296 |

**N-13-2w-c**

|   |           |           |           |
|---|-----------|-----------|-----------|
| N | -2.018071 | -0.652906 | -0.034846 |
| N | 0.187692  | -1.089028 | -0.511207 |
| C | -0.826817 | -0.225314 | -0.271731 |
| H | 1.140282  | -0.775091 | -0.652961 |
| C | -0.531754 | 1.228151  | -0.349215 |
| H | -1.331075 | 1.941989  | -0.485308 |
| N | 0.643989  | 1.755348  | -0.259802 |
| O | 1.773225  | 1.220792  | -0.101208 |
| O | 0.674687  | 3.135825  | -0.360005 |
| C | -3.104693 | 0.275664  | 0.223365  |
| H | -3.329710 | 0.882436  | -0.669746 |
| H | -2.857647 | 0.978288  | 1.035111  |
| C | -4.355974 | -0.502510 | 0.608484  |
| H | -5.195263 | 0.172417  | 0.801325  |
| H | -4.631485 | -1.189059 | -0.196186 |
| H | -4.165914 | -1.095822 | 1.506756  |
| C | -0.053806 | -2.513979 | -0.459964 |
| H | -0.801671 | -2.804851 | -1.205246 |
| H | 0.893968  | -3.013897 | -0.656650 |
| H | -0.439812 | -2.804237 | 0.523314  |
| O | 3.023696  | -1.703748 | -0.723207 |
| H | 3.252796  | -1.462571 | 0.190681  |
| H | 3.681650  | -1.282564 | -1.283456 |

|   |          |           |           |
|---|----------|-----------|-----------|
| O | 2.995739 | -0.482846 | 1.767050  |
| H | 2.486791 | 0.243982  | 1.373268  |
| H | 3.471804 | -0.134993 | 2.525490  |
| H | 1.629509 | 3.317819  | -0.332082 |

**N-13-3w**

|   |           |           |           |
|---|-----------|-----------|-----------|
| N | -2.991172 | 0.068559  | 0.098176  |
| N | -1.363834 | 1.609538  | -0.393136 |
| C | -1.753269 | 0.327031  | -0.132658 |
| H | -0.428335 | 1.751779  | -0.742003 |
| C | -0.710247 | -0.722408 | -0.108982 |
| H | -0.972791 | -1.743792 | 0.120413  |
| N | 0.552142  | -0.545693 | -0.348066 |
| O | 1.138336  | 0.540205  | -0.668144 |
| O | 1.337814  | -1.636084 | -0.237750 |
| C | -3.424522 | -1.281073 | 0.418775  |
| H | -2.923984 | -1.656596 | 1.325266  |
| H | -3.183008 | -1.981924 | -0.395963 |
| C | -4.930033 | -1.290821 | 0.646380  |
| H | -5.284463 | -2.297587 | 0.886683  |
| H | -5.189979 | -0.619847 | 1.469328  |
| H | -5.447214 | -0.939896 | -0.250562 |
| C | -2.367313 | 2.642013  | -0.524008 |
| H | -2.927597 | 2.743225  | 0.409597  |
| H | -1.867484 | 3.584058  | -0.753308 |
| H | -3.088261 | 2.401728  | -1.314177 |
| H | 2.260361  | -1.375209 | -0.634838 |
| O | 3.584505  | -1.052749 | -1.219379 |
| H | 3.457258  | -0.287276 | -1.792877 |
| H | 4.249585  | -0.783824 | -0.537168 |
| O | 2.857388  | 1.249998  | 1.386567  |
| H | 2.221582  | 1.063006  | 0.666176  |
| H | 2.661144  | 2.129841  | 1.720134  |
| O | 5.115967  | -0.078870 | 0.733503  |
| H | 5.505652  | -0.618598 | 1.427306  |
| H | 4.417807  | 0.475639  | 1.141756  |

**N-13-3w-a**

|   |           |           |           |
|---|-----------|-----------|-----------|
| N | -2.134994 | -0.295839 | -0.001054 |
| N | -0.617155 | 1.407240  | -0.315147 |

|   |           |           |           |
|---|-----------|-----------|-----------|
| C | -0.909907 | 0.097551  | -0.134158 |
| H | 0.354444  | 1.665675  | -0.395639 |
| C | 0.216219  | -0.862345 | -0.118314 |
| H | 0.031276  | -1.924186 | -0.087115 |
| N | 1.476474  | -0.548071 | -0.140824 |
| O | 1.986400  | 0.608675  | -0.198839 |
| O | 2.336794  | -1.590383 | -0.092632 |
| C | -2.431546 | -1.709043 | 0.192990  |
| H | -1.912010 | -2.107667 | 1.077551  |
| H | -2.103104 | -2.304820 | -0.672686 |
| C | -3.930024 | -1.908486 | 0.377653  |
| H | -4.164522 | -2.966206 | 0.525908  |
| H | -4.281869 | -1.351248 | 1.251192  |
| H | -4.471682 | -1.555736 | -0.505316 |
| C | -1.661964 | 2.408506  | -0.360607 |
| H | -2.230699 | 2.431204  | 0.574268  |
| H | -1.197018 | 3.380557  | -0.526074 |
| H | -2.370531 | 2.201639  | -1.168559 |
| H | 3.274516  | -1.225447 | -0.287337 |
| O | 4.739486  | -0.833160 | -0.474880 |
| H | 5.028421  | -0.635712 | -1.371734 |
| H | 4.866411  | -0.019278 | 0.062466  |
| O | 4.383147  | 1.389273  | 0.967564  |
| H | 4.490630  | 1.565417  | 1.906562  |
| H | 3.431832  | 1.292519  | 0.783518  |
| O | -4.509346 | 1.401609  | 0.057479  |
| H | -3.729521 | 0.809800  | 0.035370  |
| H | -5.275362 | 0.834983  | 0.181890  |

**N-13-3w-b**

|   |           |           |           |
|---|-----------|-----------|-----------|
| N | -2.714921 | 0.207595  | -0.073949 |
| N | -0.774947 | 1.439849  | -0.120388 |
| C | -1.428692 | 0.251230  | -0.102940 |
| H | 0.234231  | 1.479982  | -0.039122 |
| C | -0.605533 | -0.980020 | -0.217895 |
| H | -1.015676 | -1.880922 | -0.649871 |
| N | 0.625045  | -1.079528 | 0.170860  |
| O | 1.327485  | -0.185271 | 0.718531  |
| O | 1.205670  | -2.303702 | 0.007492  |
| C | -3.403202 | -1.072051 | -0.079189 |

|   |           |           |           |
|---|-----------|-----------|-----------|
| H | -2.996261 | -1.761754 | 0.676569  |
| H | -3.295335 | -1.569642 | -1.057500 |
| C | -4.885120 | -0.854055 | 0.195692  |
| H | -5.432321 | -1.801411 | 0.178292  |
| H | -5.020348 | -0.387243 | 1.175031  |
| H | -5.310833 | -0.185156 | -0.556899 |
| C | -1.522096 | 2.672314  | -0.034777 |
| H | -2.128718 | 2.703114  | 0.877558  |
| H | -0.808310 | 3.497115  | -0.031239 |
| H | -2.205603 | 2.771905  | -0.884456 |
| H | 2.181642  | -2.118927 | -0.125302 |
| O | 3.761389  | -1.860024 | -0.507617 |
| H | 4.070337  | -2.053076 | -1.397930 |
| H | 4.076126  | -0.968394 | -0.263257 |
| O | 3.845443  | 0.671091  | 0.536977  |
| H | 4.308778  | 0.884653  | 1.353736  |
| H | 2.958569  | 0.327890  | 0.783038  |
| O | 1.944332  | 2.642399  | -0.381918 |
| H | 2.761839  | 2.147178  | -0.219610 |
| H | 2.068949  | 3.118822  | -1.207760 |

**N-13-3w-c**

|   |           |           |           |
|---|-----------|-----------|-----------|
| N | 2.807162  | 0.494843  | 0.040388  |
| N | 0.905570  | 1.812204  | 0.017574  |
| C | 1.564281  | 0.655111  | 0.301513  |
| H | -0.108963 | 1.785715  | 0.063615  |
| C | 0.706242  | -0.357151 | 0.993811  |
| N | -0.279632 | -0.891793 | 0.361326  |
| O | -0.613979 | -0.699612 | -0.840812 |
| O | -1.031717 | -1.793364 | 1.081920  |
| C | 3.423404  | -0.785456 | 0.346898  |
| H | 3.022209  | -1.242638 | 1.265579  |
| H | 4.488347  | -0.605930 | 0.523855  |
| C | 3.256585  | -1.764707 | -0.814887 |
| H | 3.774319  | -2.707401 | -0.612087 |
| H | 2.195771  | -1.976828 | -0.986713 |
| H | 3.663332  | -1.329269 | -1.731586 |
| C | 1.552584  | 2.810864  | -0.805413 |
| H | 1.861068  | 2.392903  | -1.771518 |
| H | 0.854672  | 3.633668  | -0.965129 |

|   |           |           |           |
|---|-----------|-----------|-----------|
| H | 2.449717  | 3.186489  | -0.306037 |
| H | 0.833930  | -0.656487 | 2.024410  |
| O | -4.374960 | 0.838983  | -0.308120 |
| H | -5.248095 | 0.844942  | 0.093122  |
| H | -4.165243 | -0.082271 | -0.545167 |
| O | -3.107105 | -1.568110 | -0.852119 |
| H | -2.249490 | -1.185711 | -1.157095 |
| H | -3.332659 | -2.287952 | -1.450452 |
| O | -1.916537 | 1.425283  | 0.878102  |
| H | -2.047734 | 1.821378  | 1.744695  |
| H | -2.800765 | 1.363272  | 0.470345  |
| H | -1.886313 | -1.838064 | 0.601855  |

**N-13-4w**

|   |           |           |           |
|---|-----------|-----------|-----------|
| N | -3.266078 | 0.332645  | 0.047852  |
| N | -1.412570 | 1.626779  | -0.355608 |
| C | -2.003108 | 0.409090  | -0.174325 |
| H | -0.405687 | 1.663466  | -0.313040 |
| C | -1.151977 | -0.796889 | -0.304849 |
| H | -1.604580 | -1.774982 | -0.369098 |
| N | 0.141923  | -0.815300 | -0.365076 |
| O | 0.927038  | 0.194702  | -0.269949 |
| O | 0.719734  | -2.010929 | -0.571145 |
| C | -3.922196 | -0.956060 | 0.198682  |
| H | -3.451883 | -1.555606 | 0.993141  |
| H | -3.856617 | -1.543470 | -0.730966 |
| C | -5.389620 | -0.741853 | 0.543550  |
| H | -5.907264 | -1.697947 | 0.664682  |
| H | -5.476959 | -0.173912 | 1.473517  |
| H | -5.882545 | -0.171244 | -0.247837 |
| C | -2.197252 | 2.828291  | -0.175718 |
| H | -2.627966 | 2.879733  | 0.831171  |
| H | -1.552559 | 3.691351  | -0.346742 |
| H | -3.026445 | 2.845585  | -0.887919 |
| H | 1.702572  | -1.974118 | -0.172400 |
| O | 3.035456  | -1.968765 | 0.327967  |
| H | 3.052254  | -1.309166 | 1.071306  |
| H | 3.583879  | -1.573024 | -0.367847 |
| O | 3.350674  | 0.134471  | -1.550531 |
| H | 2.423170  | 0.185604  | -1.230191 |

|   |          |          |           |
|---|----------|----------|-----------|
| H | 3.327118 | 0.184024 | -2.511215 |
| O | 2.797737 | 0.110618 | 1.969823  |
| H | 3.517289 | 0.717929 | 1.719207  |
| H | 2.012874 | 0.431732 | 1.501151  |
| O | 4.707004 | 1.452323 | 0.485131  |
| H | 4.399785 | 1.151112 | -0.387908 |
| H | 5.214412 | 2.259220 | 0.366407  |

**N-13-4w-a**

|   |           |           |           |
|---|-----------|-----------|-----------|
| N | 3.218873  | 0.121074  | 0.151237  |
| N | 1.480865  | 1.601197  | -0.089198 |
| C | 1.972213  | 0.323375  | -0.082621 |
| H | 0.567013  | 1.735949  | -0.493916 |
| C | 1.025958  | -0.787946 | -0.328708 |
| H | 1.378731  | -1.807959 | -0.324565 |
| N | -0.242529 | -0.676445 | -0.576267 |
| O | -0.915175 | 0.412535  | -0.636195 |
| O | -0.912477 | -1.810074 | -0.812106 |
| C | 3.758568  | -1.227110 | 0.220062  |
| H | 3.620974  | -1.758285 | -0.734699 |
| H | 3.250386  | -1.820793 | 0.995873  |
| C | 5.245822  | -1.163900 | 0.539668  |
| H | 5.677658  | -2.167459 | 0.595709  |
| H | 5.772118  | -0.596542 | -0.232357 |
| H | 5.403791  | -0.659001 | 1.496300  |
| C | 2.408423  | 2.709280  | -0.008446 |
| H | 3.145940  | 2.677946  | -0.819260 |
| H | 1.841594  | 3.639969  | -0.059570 |
| H | 2.958071  | 2.668227  | 0.935180  |
| H | -1.957984 | -1.609176 | -0.735816 |
| O | -3.349164 | -1.463802 | -0.641629 |
| H | -3.682480 | -1.460627 | 0.279922  |
| H | -3.616801 | -0.601722 | -1.027099 |
| O | -2.599070 | 1.386200  | 1.266168  |
| H | -1.890780 | 0.967623  | 0.729430  |
| H | -2.165361 | 2.006744  | 1.861070  |
| O | -3.573229 | 1.158824  | -1.464872 |
| H | -3.587827 | 1.599612  | -0.602342 |
| H | -2.632893 | 1.122720  | -1.694651 |
| O | -4.047923 | -0.880980 | 1.932439  |

|   |           |           |          |
|---|-----------|-----------|----------|
| H | -4.925717 | -0.809370 | 2.317733 |
| H | -3.646503 | 0.007545  | 1.922478 |

**N-13-4w-b**

|   |           |           |           |
|---|-----------|-----------|-----------|
| N | -2.954587 | 0.339133  | 0.130449  |
| N | -1.128067 | 1.320037  | -0.870110 |
| C | -1.759460 | 0.219153  | -0.317213 |
| H | -0.387879 | 1.097852  | -1.524621 |
| C | -1.001187 | -1.044724 | -0.227123 |
| H | -1.454374 | -1.918961 | 0.212890  |
| N | 0.213828  | -1.235563 | -0.654774 |
| O | 0.987934  | -0.393615 | -1.194646 |
| O | 0.698498  | -2.484315 | -0.514283 |
| C | -3.619255 | -0.775046 | 0.787868  |
| H | -3.043800 | -1.118058 | 1.661396  |
| H | -3.713010 | -1.633819 | 0.105507  |
| C | -5.007815 | -0.346178 | 1.241182  |
| H | -5.530034 | -1.170502 | 1.735353  |
| H | -4.934337 | 0.492071  | 1.939039  |
| H | -5.599479 | -0.019393 | 0.382082  |
| C | -1.948007 | 2.481842  | -1.172986 |
| H | -2.371090 | 2.883078  | -0.250288 |
| H | -1.313909 | 3.235680  | -1.642112 |
| H | -2.785012 | 2.231205  | -1.835496 |
| H | 1.734224  | -2.391251 | -0.510494 |
| O | 3.196712  | -2.280536 | -0.331865 |
| H | 3.652167  | -3.038479 | 0.048754  |
| H | 3.423749  | -1.487848 | 0.228572  |
| O | 3.657249  | -0.243642 | 1.273611  |
| H | 2.823545  | 0.135975  | 1.589592  |
| H | 4.135881  | 0.533009  | 0.928859  |
| O | 1.474661  | 1.516080  | 0.737398  |
| H | 0.576281  | 1.870680  | 0.780378  |
| H | 1.429865  | 0.896106  | -0.019247 |
| O | 4.088403  | 2.344779  | 0.381235  |
| H | 3.125250  | 2.427799  | 0.496236  |
| H | 4.500428  | 3.129317  | 0.752684  |

**N-13-4w-c**

|   |          |           |          |
|---|----------|-----------|----------|
| N | 2.929415 | -0.481576 | 0.092695 |
|---|----------|-----------|----------|

|   |           |           |           |
|---|-----------|-----------|-----------|
| N | 1.242115  | -1.983799 | -0.330105 |
| C | 1.682707  | -0.705812 | -0.117035 |
| H | 0.316711  | -2.089834 | -0.717771 |
| C | 0.680513  | 0.384701  | -0.103548 |
| H | 0.984935  | 1.396933  | 0.129571  |
| N | -0.579874 | 0.249181  | -0.365731 |
| O | -1.207470 | -0.812350 | -0.697414 |
| O | -1.342359 | 1.369589  | -0.274188 |
| C | 3.406448  | 0.866043  | 0.369153  |
| H | 2.945757  | 1.269477  | 1.283782  |
| H | 3.146016  | 1.557744  | -0.445719 |
| C | 4.918840  | 0.842042  | 0.541429  |
| H | 5.304957  | 1.844860  | 0.746970  |
| H | 5.194633  | 0.182148  | 1.368409  |
| H | 5.395014  | 0.461408  | -0.366284 |
| C | 2.214585  | -3.045447 | -0.469169 |
| H | 2.795698  | -3.142778 | 0.451600  |
| H | 1.684445  | -3.978503 | -0.665373 |
| H | 2.921715  | -2.840887 | -1.282102 |
| H | -2.275819 | 1.123085  | -0.665225 |
| O | -3.604160 | 0.841840  | -1.227989 |
| H | -3.489519 | 0.089616  | -1.821834 |
| H | -4.256416 | 0.555481  | -0.538614 |
| O | -2.873239 | -1.507067 | 1.384760  |
| H | -2.246627 | -1.332262 | 0.651683  |
| H | -2.671751 | -2.380187 | 1.732501  |
| O | -5.110806 | -0.168893 | 0.715956  |
| H | -5.513472 | 0.353320  | 1.415660  |
| H | -4.418168 | -0.732999 | 1.122989  |
| O | 0.567889  | 3.473766  | 0.111749  |
| H | -0.338983 | 3.170785  | -0.030055 |
| H | 0.521880  | 4.381709  | 0.423838  |

**S3. Cartesian coordinates of various amino and nitro substituted ethylenes (1b-1g).**

|           |           |           |           |           |           |           |           |
|-----------|-----------|-----------|-----------|-----------|-----------|-----------|-----------|
| <b>1b</b> |           |           |           | C         | 1.872540  | 0.052901  | 0.000069  |
| C         | 0.069424  | 0.428139  | -0.000529 | C         | 0.746992  | -0.642909 | 0.000004  |
| C         | 1.252360  | -0.196513 | 0.014553  | H         | 0.644199  | -1.717870 | -0.000046 |
| H         | 1.333834  | -1.278464 | 0.018907  | N         | -0.561819 | 0.031495  | -0.000009 |
| H         | 2.170399  | 0.374017  | 0.004148  | O         | -0.599755 | 1.253634  | 0.000025  |
| H         | 0.029117  | 1.513706  | -0.010853 | O         | -1.539291 | -0.708376 | -0.000090 |
| N         | -1.184622 | -0.169499 | -0.079439 | H         | 2.825833  | -0.460066 | 0.000076  |
| H         | -1.222011 | -1.157103 | 0.129920  | H         | 1.857873  | 1.135452  | 0.000115  |
| H         | -1.949692 | 0.344582  | 0.329802  |           |           |           |           |
| <b>1c</b> |           |           |           | <b>1f</b> |           |           |           |
| C         | 0.088991  | -0.000092 | -0.000018 | N         | 2.570230  | -0.116479 | -0.000439 |
| C         | 1.433753  | -0.000915 | 0.000013  | C         | 1.274635  | 0.268499  | 0.000216  |
| H         | 1.992995  | 0.920256  | 0.092924  | C         | 0.203815  | -0.553822 | 0.000027  |
| H         | 1.991890  | -0.922763 | -0.092869 | H         | 0.223198  | -1.632445 | -0.000094 |
| N         | -0.703019 | 1.153978  | -0.078752 | H         | 2.836297  | -1.087580 | 0.001807  |
| H         | -1.458162 | 1.173157  | 0.596180  | H         | 3.306936  | 0.566375  | 0.003271  |
| H         | -0.173987 | 2.014348  | -0.073769 | N         | -1.116677 | -0.000358 | -0.000124 |
| N         | -0.704463 | -1.153074 | 0.078708  | O         | -1.264752 | 1.225097  | -0.000109 |
| H         | -1.460084 | -1.171044 | -0.595692 | O         | -2.048613 | -0.806870 | -0.000242 |
| H         | -0.176738 | -2.014232 | 0.073562  | H         | 1.094923  | 1.337635  | 0.000312  |
| <b>1d</b> |           |           |           | <b>1g</b> |           |           |           |
| C         | 0.543086  | -0.390343 | 0.038462  | N         | -2.291667 | -0.815929 | -0.096960 |
| C         | -0.543087 | 0.390348  | 0.038485  | N         | -1.283189 | 1.261707  | 0.063495  |
| H         | -0.440197 | 1.473027  | 0.039861  | C         | -1.131764 | -0.081328 | 0.011455  |
| H         | 0.440190  | -1.473020 | 0.039764  | H         | -3.110587 | -0.442733 | 0.360993  |
| N         | 1.877518  | 0.056845  | -0.107262 | H         | -0.414147 | 1.787971  | 0.011925  |
| H         | 1.970573  | 1.064895  | -0.073167 | C         | 0.084180  | -0.735408 | 0.055495  |
| H         | 2.517490  | -0.367529 | 0.553477  | H         | 0.153503  | -1.809574 | 0.097618  |
| N         | -1.877521 | -0.056834 | -0.107284 | N         | 1.325702  | -0.087079 | 0.000755  |
| H         | -2.517477 | 0.367407  | 0.553559  | O         | 1.376049  | 1.166098  | -0.018074 |
| H         | -1.970555 | -1.064891 | -0.073355 | O         | 2.339503  | -0.790350 | -0.019339 |
| <b>1e</b> |           |           |           | H         | -2.201717 | -1.817277 | -0.020264 |
|           |           |           |           | H         | -2.121880 | 1.665145  | -0.323694 |
